1        **Strong Patterns of Intraspecific Variation and Local Adaptation in Great Basin Plants**  
2                                    **Revealed Through a Review of 75 Years of Experiments**

3  
4    Owen W. Baughman<sup>1</sup>, Alison C. Agneray<sup>1</sup>, Matthew L. Forister<sup>1</sup>, Francis F. Kilkenny<sup>3</sup>, Erin K.  
5    Espeland<sup>4</sup>, Rob Fiegener<sup>5</sup>, Matthew E. Horning<sup>6</sup>, Richard C. Johnson<sup>7</sup>, Thomas N. Kaye<sup>5</sup>, Jeffrey  
6    E. Ott<sup>3</sup>, J. Bradley St. Clair<sup>8</sup>, Elizabeth A. Leger<sup>1,2</sup>

7  
8    <sup>1</sup>Department of Natural Resources and Environmental Science, University of Nevada, 1664 N.  
9    Virginia St., Reno, NV 89557 USA; <sup>2</sup>Corresponding author, [ealeger@gmail.com](mailto:ealeger@gmail.com); <sup>3</sup>USDA Forest  
10    Service, Rocky Mountain Research Station, 322 E Front St. Suite 401, Boise, ID 83702 USA;  
11    <sup>4</sup>Pest Management Research Unit, USDA-Agricultural Research Service Northern Plains  
12    Agricultural Laboratory, 1500 N Central Ave., Sidney, MT 59270 USA; <sup>5</sup>Institute for Applied  
13    Ecology, 563 SW Jefferson Ave., Corvallis, OR 97333 USA; <sup>6</sup>USDA Forest Service Pacific  
14    Northwest Region, Deschutes National Forest, 63095 Deschutes Market Rd., Bend, OR 97701;  
15    <sup>7</sup>Washington State University, PO Box 646240, Pullman, WA 99164 USA; <sup>8</sup>USDA Forest  
16    Service, Pacific Northwest Research Station, 3200 SW Jefferson Way, Corvallis OR, 97331

17    **Keywords:** Local adaptation, phenotypic traits, meta-analysis, common garden, reciprocal  
18    transplant, natural selection, intraspecific variation, restoration

19  
20    **Running head:** Local adaptation in Great Basin plants

21 **Abstract**

22           Variation in natural selection across heterogenous landscapes often produces 1) among-  
23 population differences in phenotypic traits, 2) trait-by-environment associations, and 3) higher  
24 fitness of local populations. Using a broad literature search, we documented the frequency of  
25 these three signatures in plants native to North America's Great Basin and asked which traits and  
26 environmental variables were involved. We also asked, independent of geographic distance,  
27 whether populations from more similar environments had more similar traits. From 327  
28 experiments testing 121 taxa in 170 studies, we found 95.1% of 305 experiments reported  
29 among-population differences, and 81.4% of 161 experiments reported trait-by-environment  
30 associations. Locals showed greater survival in 67% of 24 reciprocal experiments that reported  
31 survival, and higher fitness in 90% of 10 reciprocal experiments that reported reproductive  
32 output. Variation in eight commonly-measured traits was associated with mean annual  
33 precipitation and mean annual temperature at the source location, with notably strong  
34 relationships for flowering phenology, leaf size, and survival, among others. Although the Great  
35 Basin is sometimes perceived as environmentally homogenous, our results demonstrate  
36 widespread habitat-related population differentiation and local adaptation, suggesting that  
37 locally-sourced plants likely harbor restoration-relevant adaptations, and that certain key traits  
38 and environmental variables should be prioritized in future assessments of plants.

39

## 40 **Introduction**

41 All plant species have limits to the range of conditions in which they can live, and all but  
42 the narrowest endemics grow across environments that vary in biotic and abiotic conditions. This  
43 natural complexity has significant impacts on individual survival and reproduction, and thus  
44 plant evolution (Loveless and Hamrick, 1984; Linhart and Grant, 1996; Ackerly *et al.*, 2000;  
45 Reich *et al.*, 2003). As plants are subject to different conditions associated with their local  
46 environment, populations of the same species will experience differential selection pressures  
47 (Turesson, 1922; Clausen, Keck and Hiesey, 1948; Antonovics and Bradshaw, 1968; Langlet,  
48 1971), creating habitat-correlated intraspecific variation. When this intraspecific variation results  
49 in populations that are more fit in their home environment than foreign populations, these  
50 populations are considered to be locally adapted (Kawecki and Ebert, 2004; Blanquart *et al.*,  
51 2013). The existence of local adaptation is well-established across different organisms and  
52 ecosystems, although our synthetic knowledge of this important topic rests on surprisingly few  
53 reviews of the subject (e.g., Leimu and Fischer, 2008; Hereford, 2009). Here, we focus on a  
54 particular region and ask if plant species share patterns of intraspecific variation and local  
55 adaptation, and, across taxa, what functional traits and environmental variables are most  
56 important for such patterns in this region. The regional focus provides a strong test of  
57 expectations generated from more heterogenous samples and provides an opportunity to link  
58 basic evolutionary patterns with applied concerns.

59 The detection of local adaptation ideally involves reciprocal transplant experiments  
60 designed to test for a local advantage across environments (Blanquart *et al.*, 2013; Bucharova,  
61 Durka, *et al.*, 2017). However, patterns associated with local adaptation (hereafter, signatures)  
62 can be detected in non-reciprocal comparisons of different populations of the same species

63 (Endler, 1986). When populations are locally adapted to abiotic or environmental variables, we  
64 expect to see three basic signatures: 1) differences among populations in fitness-related traits, 2)  
65 correlations between these trait values and environmental or other habitat-related variables, and,  
66 if reciprocal transplants or common gardens have been conducted, 3) higher fitness of local over  
67 nonlocal populations in the local environment. Although population differences (signature 1) are  
68 necessary for local adaptation, they alone are not sufficient evidence for it due to factors such as  
69 genetic drift, high gene flow, and rapid environmental change, among other factors (Kawecki  
70 and Ebert, 2004; Blows and Hoffmann, 2005). While fitness differences in reciprocal transplant  
71 experiments (signature 3) are the “gold standard” for detecting local adaptation, there are  
72 experimental trade-offs between the number of populations sampled and the ability to do fully  
73 reciprocal transplants (Blanquart *et al.*, 2013). Thus, correlative approaches (signature 2) are  
74 popular alternatives that can sample many more populations to infer local adaptation (e.g. St  
75 Clair, Mandel and Vance-Borland, 2005), though spurious correlations, low sample sizes, or high  
76 variability in trait values could over- or under-predict the degree of local adaptation in wild  
77 populations using this approach. Given these considerations, separately reporting all three  
78 signatures can give an overall picture of the likelihood of within-species variation and potential  
79 local adaptation in a region, and is the first step towards a better understanding of variation in the  
80 strength and consistency of natural selection (Siepielski, Dibattista and Carlson, 2009).

81         The Great Basin Desert of North America is a ~540,000 km<sup>2</sup> cold desert landscape  
82 characterized by hundreds of internally-draining basin and range formations, which create high  
83 spatial and environmental heterogeneity and variability (Tisdale and Hironaka, 1981; Comstock  
84 and Ehleringer, 1992). While these are the kinds of conditions that would be expected to result in  
85 widespread local adaptation, the flora of the Great Basin is poorly represented in the relatively

86 few reviews on the subject (Leimu and Fischer, 2008; Hereford, 2009), and this has resulted in  
87 uncertainty as to the prevalence, magnitude, and importance that local adaptation plays in this  
88 large and increasingly imperiled region (US House of Representatives Committee on  
89 Appropriations, 2014; Jones, Monaco and Rigby, 2015; Chivers *et al.*, 2016). Gaining a better  
90 understanding of potential fitness differences between populations of the same species is  
91 important in the Great Basin not only because it is a large, relatively intact floristic region in the  
92 Western US, but because it has direct impacts on conservation and restoration efforts. Large-  
93 scale, seed-based restoration has been very common in the Great Basin for many decades  
94 (Pilliod, Welty and Toevs, 2017), and trends in large destructive wildfires (Dennison *et al.*,  
95 2014) and other disturbances (Rowland, Suring and Michael, 2010; Davies *et al.*, 2011) ensure  
96 even higher demand for restoration efforts in the future. Guided by the various national policies  
97 and strategies dating from the 1960s (Richards, Chambers and Ross, 1998) to the present  
98 National Seed Strategy (Plant Conservation Alliance, 2015) and Integrated Rangeland Fire  
99 Management Strategy (USDOI, 2015), a growing majority of these efforts are using native plant  
100 seeds or transplants. However, few of the widely-available sources of commercially-produced  
101 seeds of native species originate from populations within the Great Basin (Jones and Larson,  
102 2005) or have been selected based on their success in restoring Great Basin habitats (Leger and  
103 Baughman, 2015), and demand for native seed has always exceeded supply (McArthur and  
104 Young, 1999; Johnson *et al.*, 2010). This has resulted in the prioritization of seed quantity and  
105 uniformity over population suitability and local adaptation (Meyer, 1997; Richards, Chambers  
106 and Ross, 1998; Leger and Baughman, 2015), and therefore it is still uncommon for  
107 restorationists in this region to prioritize or even have the option to prioritize the use of local  
108 populations, despite growing support of the importance of such practices (Basey, Fant and

109 Kramer, 2015; Espeland *et al.*, 2017).

110           Though our understanding of the prevalence and scale of local adaptation in the Great  
111 Basin is far from complete, there is an abundant literature of peer-reviewed studies on the plants  
112 native to this region spanning over 75 years that have directly measured trait variation between  
113 populations via laboratory and greenhouse trials, common gardens, and reciprocal transplants.  
114 Many of these studies have also tested for correlations between intraspecific variation and  
115 environmental variables, and some were designed to detect local adaptation. This research  
116 includes common gardens (e.g. McMillan, 1959; Kramer, Larkin and Fant, 2015), studies of  
117 germination patterns (e.g. McArthur, Meyer and Weber, 1987; Meyer *et al.*, 1995), large  
118 genecology experiments (e.g. Erickson, Mandel and Sorenson, 2004; Johnson, Leger and Vance-  
119 Borland, 2017), and reciprocal transplants (e.g. Evans and Young, 1990; Barnes, 2009), among  
120 other types of studies. This rich literature provides an opportunity to summarize local adaptation  
121 and its associated patterns, or signatures (defined above), in this region, as well as describe  
122 which phenotypic traits have the strongest signatures of local adaptation.

123           Here, we present results of a broad literature search and subsequent meta-analysis using  
124 published studies that compared phenotypic traits of multiple populations of native Great Basin  
125 species in one or more common environments. Our first objective was to record the frequency  
126 and nature of the three expected signatures of local adaptation (population variation, trait-by-  
127 environment association, and greater local fitness) within grasses, forbs, shrubs, and deciduous  
128 trees native to the Great Basin, and ask how common these signatures are, and which phenotypic  
129 traits and environmental variables were most commonly associated with these signatures. We  
130 also present results by taxonomic group, lifeform, lifespan, distribution, and mating system. Our  
131 second objective was to examine links between the magnitude of trait and environmental (mean

132 annual precipitation and mean annual temperature) divergence among populations across  
133 multiple taxa, asking whether populations from more similar environments were more similar in  
134 phenotypic traits. We also asked which traits and environmental variables showed the strongest  
135 patterns of divergence.

136 We expected to find widespread evidence of local adaptation and its signatures in the  
137 plants of the Great Basin, and we hypothesize that phenological and size-based traits, which  
138 show phenotypic variation in response to climate variation in both plants and animals (e.g.  
139 Sheridan and Bickford, 2011; Anderson *et al.*, 2012) and have been observed to be under  
140 selection in the Great Basin (Leger and Baughman, 2015), would be important indicators of  
141 adaptation in this region. We discuss our results both as a contribution to our general  
142 understanding of natural selection in plants, and as an example of evolutionary theory applied to  
143 the management and restoration of a large geographic region, where active and ongoing  
144 management can benefit from information on intraspecific variation and local adaptation.

## 145 **Methods**

### 146 *Literature search*

147 We began by using online search engines Google Scholar and Web of Science to search  
148 for combinations of key terms (see additional methods in Supporting Information Appendix S1).  
149 In order to be included in our review, a study had to meet all these criteria:

- 150 a) Examined a species that is native within the floristic Great Basin
- 151 b) Examined and compared more than one population of that species
- 152 c) Measured at least one phenotypic, physiological, phenological, or other  
153 potentially fitness-related trait (e.g. survival; hereafter, trait)
- 154 d) Measured the trait(s) of the populations in at least one common environment

155 (including laboratories, growth chambers, greenhouses, or outside gardens;  
156 hereafter, garden).

157 Determination of nativity to the Great Basin was defined as at least one occurrence with  
158 native status within the floristic Great Basin according to occurrence information from the  
159 USDA Plants Database (USDA and NRCS, 2018) and/or the U.S Virtual Herbarium Online  
160 (Barkworth *et al.*, 2018). A total of 170 published studies published between 1941 and July 2017  
161 were encountered that met these criteria.

### 162 *Categorization and scoring of literature*

163 All studies meeting our criteria were categorized and scored for each signature. The  
164 coordinates of all gardens and populations in each study were recorded or, if possible, generated  
165 from localities described in the studies (Supporting Information Appendix S1). For each study,  
166 we then noted these 15 characteristics: the year published, year(s) of plant material collection,  
167 year(s) of experimentation, number of years reported, taxa (genus, species, subspecies), life  
168 history traits (taxonomic status, lifeform, geographic range, life span, breeding system),  
169 experiment type (laboratory, greenhouse, common garden, reciprocal transplant), number of  
170 gardens, number of populations tested, which generation of material was used, and whether or  
171 not experimenters attempted to control maternal effects prior to testing (Supporting Information  
172 Appendix S1). Life history traits were compiled for each taxon from the USDA Plants Database  
173 as well as from published literature (Supporting Information Appendix S1). Each taxon  
174 (subspecies level, if given) was entered separately for studies addressing multiple taxa. In studies  
175 where more than one experiment was performed, and the experiments differed in the experiment  
176 type (defined above), the identity of the populations being compared, and/or the generation of  
177 material used, they were entered as separate experiments. In cases where the list of tested



178 populations were identical among multiple published studies, and these materials came from the  
179 same collections, these experiments were entered separately if the garden type or location(s)  
180 differed among the studies or if authors separately published different traits from the same  
181 gardens, ensuring that no trait was recorded twice for the same set of populations in the same  
182 garden. In cases where the list of tested populations did not completely overlap between studies,  
183 even if some from each study arose from the same collections, they were entered separately. A  
184 total 327 taxa-specific entries (hereafter, experiments) were generated from the 170 published  
185 studies (Supporting Information Appendix S2).

186         The first two expected signatures of local adaptation were scored using a Yes/No  
187 designation for each experiment which considered all measured phenotypic traits. A score of  
188 “Yes”, or, in the absence of supporting statistical evidence, “Authors claim Yes”, was given  
189 when at least one measured trait significantly demonstrated the signature for at least two  
190 populations, and a score of “No” or “Authors claim No” was given when the signature was not  
191 detected between any pair of populations (Supporting Information Appendix S1). In addition,  
192 each of the measured and reported traits and environmental variables were scored (hereafter, trait  
193 scores) in the same way for each signature. Of the 327 experiments, 305 (93.3%) met the criteria  
194 to score for signature 1 and 161 (49.5%) met the criteria to score for signature 2. Pearson’s chi-  
195 squared tests were used to determine if there were differences in signatures 1 and 2 among plants  
196 with different life-history traits, using totals from both “Yes/No” and “Authors Claim Yes/No”  
197 results, excluding any life history groups represented by less than 10 experiments.

198         To score whether there was higher fitness of a local population in a common garden  
199 (hereafter, signature 3), only experiments in which outdoor reciprocal transplants or common  
200 gardens were performed using a local population in at least one garden were considered

201 (Supporting Information Appendix S1). Additionally, the experiment had to measure survival,  
202 reproductive output (number of seeds or flowers, or other reproductive output), a fitness index (a  
203 combination of several size and production traits), or total aboveground biomass. Each  
204 experiment was given a composite score to fully capture variation in the performance of each  
205 garden's local population, across multiple gardens as well as through multiple sampling dates.  
206 These scores refer only to those gardens within each experiment that each had their own local  
207 population. The five scores were "Yes for all gardens at all times", "Yes for all gardens at some  
208 times", "Yes for some gardens at all times", "Yes for some gardens at some times", and "No for  
209 all gardens at all times" (Supporting Information Appendix S1). Of the 326 experiments, 27  
210 (8.3%) were appropriate for this scoring. This scoring provides an estimate of the frequency of  
211 higher local fitness, but it is not a measure of the importance of the difference per se. For  
212 example, a fitness difference could occur at a low frequency, but have a large impact on  
213 population trajectories (i.e. large differences in survival after a rare drought event).

214 Our dataset contained the possibility of bias associated with highly-studied taxa  
215 influencing patterns more than less-studied taxa. For example, some species were represented in  
216 our dataset more than once, and some widespread, community dominants (e.g. *Artemisia*  
217 *tridentata*, *Ericameria nauseosa*, etc.) were represented many times. To ask how this affected  
218 overall responses, we tallied all scores without correcting for multiple experiments per species as  
219 well as using an average score for each species for each signature. To generate these average  
220 scores for signature 1 and 2, we totaled all "Yes" and "Authors claim Yes" scores for each  
221 species and divided by the total number of scores (all Ys plus all Ns) for that species. For  
222 signature 3, all forms of "Yes" (all but "No for all gardens at all times") were totaled into a Y  
223 and divided by the total number of scores. Then, we averaged these per-species scores to re-

224 calculate overall effects in which each species was represented only once.

225 *Quantitative comparison of trait-by-environment associations*

226 As a complement to the survey of author-reported results described above, we conducted  
227 a further, quantitative analysis of trait and climate values. This approach has the potential  
228 disadvantage of using data (trait values) for a purpose for which they were not originally  
229 collected, but the advantage of considering a standard set of environmental values. Specifically,  
230 to examine associations between the differences in trait values and the differences in  
231 environmental and geographic distance among population origins, we utilized experiments from  
232 which population-specific trait data and geographic coordinates could be extracted or obtained  
233 through author contact. Data from laboratory and greenhouse experiments were not considered  
234 for this extraction. First, we identified the most commonly measured traits across studies, which  
235 were then manually extracted from text, tables, or graphical data (Supporting Information  
236 Appendix S1). Next, we extracted trait data from the latest sampling date for which the most  
237 populations at the most gardens were represented, and if multiple treatments were used, we only  
238 extracted data for the author-defined ‘control’ treatment. However, if no control was defined, we  
239 used the treatment that was the most unaltered or representative of the garden environment (e.g.  
240 unweeded, or unwatered). Data from each garden within each experiment was extracted  
241 separately and considered its own sample (hereafter, garden-specific experiment). Finally, we  
242 generated 30-year annual precipitation and mean annual temperature values for each  
243 population’s location of origin using the ClimateNA v5.10 software package based on  
244 methodology described by Wang et al. (Wang *et al.*, 2016). Because studies took place at many  
245 times over the last 75 years, we extracted these climate data for each experiment for the 30-year  
246 climate normal that did not surpass the years during which the populations were collected

247 (Supporting Information Appendix S2).

248 To reduce the likelihood of spurious correlations or false negative results, we limited this  
249 dataset to only include garden-specific experiments that measured a trait in at least 5 populations  
250 in a common garden, and to traits for which we had at least 20 garden-specific experiments  
251 (mean garden-specific experiments per trait: 34.4; range: 21-46), resulting in 81 garden-specific  
252 experiments (from 56 experiments) that measured at least one of eight frequently-measured  
253 phenotypic traits (Table 1). Within each garden-specific experiment, we calculated pairwise  
254 Euclidean distances (normalized) for each trait value, climate factor, and geographic distance for  
255 every possible pair of populations. Geographic distances were generated using the `earth.dist`  
256 function in `fossil` package (Vavrek, 2011) in the statistical computing environment R (R Core  
257 Team, 2017). Then, partial Mantel tests were used to compare pairwise trait and climate  
258 distances for each experiment while controlling for geographic distances, using the `vegan`  
259 package (Oksanen *et al.*, 2018) in R (R Core Team, 2017). We used the `metacor.DSL` function in  
260 the `metacor` package (Laliberté, 2011) to generate an overall effect size (partial correlation) and  
261 upper and lower confidence intervals for each combination of trait and environmental variable.  
262 Lastly, to better understand effect sizes, we ran regression analyses on each experiment,  
263 comparing pairwise changes in trait and environmental differences by generating a slope that  
264 estimated trait change per unit change in climate factors. Experiments with  $R^2$  values of 0.2 or  
265 less were excluded, and the median slope from each trait by environment pair for remaining  
266 studies was used as an estimate. Due to limited sample sizes for factors such as lifeform, mating  
267 system, geographic distribution, etc., we did not include these factors in any of the quantitative  
268 analyses, but present lifeform (shrub, grass, or forb) information for each trait response as  
269 additional results in the Supporting Information Appendix S3.

## 270 **Results**

### 271 *Summary of reviewed literature*

272 Our literature search revealed 170 published studies that measured trait responses from  
273 more than one population in at least one common environment, resulting in 327 separate  
274 experiments involving 121 taxa of 104 species of grasses, shrubs, forbs, and deciduous trees  
275 (Fig. 1). These experiments represent approximately 3,234 unique populations tested in  
276 approximately 208 outdoor garden locations (Fig. 2) and 154 indoor lab or greenhouse  
277 experiments. Grasses accounted for 21.0% of the taxa and 40.2% of the experiments, forbs  
278 composed 50.8% of the taxa and 30.7% of experiments, shrubs 26.6% of the taxa and 28.5% of  
279 experiments, and deciduous trees accounted for only 1.6% of taxa and 0.6% of experiments (Fig.  
280 1A). Experiments were most commonly conducted in non-reciprocal outdoor common gardens  
281 (47.5%) or in the laboratory (31.9%), with fewer conducted in greenhouses (15.3%) or in  
282 reciprocal outdoor gardens (5.2%, Fig. 1B). For experiments in outdoor gardens, the average  
283 number of gardens per experiment across lifeform ranged from 1 (trees) to 1.8 (forbs) for non-  
284 reciprocal gardens, and from 2.2 (grasses) to 4 (shrubs) for reciprocal gardens (Fig. 1C). The  
285 number of populations tested in each experiment (range: 2 to 193) averaged 12.6 (Fig. 1D), with  
286 grasses ( $16.9 \pm 2.6$  SE) higher than forbs ( $10.1 \pm 1.3$  SE), shrubs ( $9.6 \pm 1.6$  SE) and trees ( $7 \pm 2$  SE).

287 Experiments took place between 1940 and 2015, with collections from native stands  
288 occurring between 1938 and 2013 (Fig. 3A). One quarter of the experiments (24.5%) reported  
289 only early germination and seedling stages of plants (generally less than 0.5 years), while the  
290 remaining experiments (75.5%) reported study periods ranging from 0.5 to 17 years, with an  
291 average of 2.1 years (Fig. 3B, C). Average pairwise geographic distance among populations per  
292 experiment for the 91% of experiments for which coordinates were available was  $351 \text{ km} \pm 20$

293 SE, with a range from 610 m to 2,551 km. Most experiments were conducted with monocots,  
294 taxa with regional distributions, perennial species, and outcrossing species; very few annuals,  
295 endemic species, or selfing species were represented (Fig. 4). Over half of experiments (58.6%)  
296 tested plants grown directly from wild-collected seeds (or the seed of wild collected adults),  
297 16.9% tested wild-collected adults, 13% tested materials with mixed generations since collection,  
298 6.7% tested 1st or 2nd generation descendants of wild collected seeds, 0.3% tested only cultivars,  
299 and 4.3% did not provide enough information to determine.

### 300 *Among-population variation*

301       Of the 305 experiments appropriate for addressing among-population trait variation  
302 (signature 1), 290 (95.1%) experiments reported finding variation among populations in at least  
303 one phenotypic trait, with 230 (75.4%) of these 290 reporting significant variation, and 60  
304 (19.6%) claiming such variation in the absence of any supporting statistics (Fig. 4A). Only 12  
305 (3.9%) experiments reported no such differentiation in any trait after statistically testing for it,  
306 and 3 (1%) claimed no such variation without presenting statistical evidence. When categorized  
307 by basic life history traits, several differences appeared among groups. Non-monocots had  
308 significantly more population-differentiation than monocots ( $X_1^2 = 7$ ,  $P = 0.0081$ ), and forbs and  
309 shrubs had more population differentiation than grasses ( $X_2^2 = 8.05$ ,  $P = 0.0143$ ). There were no  
310 significant differences in signature 1 among plants with different geographic distributions, life  
311 span, or breeding systems.

312       A total of 1,465 trait scores were recorded from the 305 experiments appropriate for  
313 addressing signature 1. Frequently-measured traits (20 or more experiments) that had differences  
314 between populations in over 75% of experiments (with or without supporting statistics) were  
315 floral structure, vigor, emergence, plant size, number of leaves, plant structure, shoot biomass,

316 leaf structure, and number of inflorescences (Fig. 5).

317 *Trait-by-environment associations*

318       Of the 161 experiments appropriate for testing trait-by-environment associations  
319 (signature 2), 131 (81.4%) reported associations for at least one comparison, with 81 (50.3%)  
320 supported by statistical tests and 50 (31.1%) supported by claims in the absence of statistics (Fig.  
321 4B). Conversely, 13 (8.1%) of experiments reported no such correlations after having  
322 statistically tested for it, and 17 (10.6%) reported no such correlations but lacked any supporting  
323 statistics. There were no significant differences in the frequency of trait-by-environment  
324 associations for taxonomic status, lifeform, geographic distribution, or breeding system, but  
325 perennials (both long-lived and short-lived) had more frequent correlations between traits and  
326 environment than did annuals or short-lived perennials ( $X_3^2 = 8.08$ ,  $P = 0.0444$ ).

327       A total of 592 trait scores were recorded from the 161 experiments appropriate for  
328 addressing signature 2 (Fig. 6A). Frequently-measured traits (20 or more experiments) that were  
329 correlated with environmental variables in over 75% of experiments (with or without supporting  
330 statistics) were multivariate trait axes, floral structure, and germination date. Every remaining  
331 trait that was measured in >15 experiments was correlated with environmental characteristics in  
332 over 50% of experiments, and many were more frequently correlated, including leaf length,  
333 survival, and flowering date, and leaf structure, which were correlated with environmental  
334 variables in  $\geq 70\%$  of experiments.

335       A total of 426 environmental variable scores were recorded from the 161 experiments  
336 appropriate for addressing signature 2 (Fig. 6B). Of the variables most frequently reported as  
337 correlated with plant traits, many categorical variables or composite metrics made this list, with  
338 seed zones, ecoregions, multivariate environmental axes, and habitat classifications topping the

339 list of important environmental variables (important in > 84% of experiments that reported  
340 them). Additionally, author-derived climate metrics, climate seasonality, and history of invasive  
341 species presence were correlated with plant traits in over 75% of studies that reported them.

#### 342 *Higher local performance in a local common garden*

343       The 27 experiments that were suitable for detecting higher fitness of a local population in  
344 a local garden (signature 3) generated 39 scores (some experiments measured multiple fitness  
345 traits), with 27 scores (69.2%) reporting signature 3 for at least one fitness trait in at least one of  
346 the tested gardens during at least one sampling date, and the remaining 12 scores (30.8%) not  
347 reporting signature 3 at any point (Fig. 4C). Thirty-two of the 39 scores (82%) were generated  
348 from experiments with more than one garden. Survival was the most frequently measured fitness  
349 trait in these experiments, reported in 24 of the 27 experiments, followed by reproduction (10),  
350 biomass (3), and fitness indices (2). Incidence of local-does-best patterns was highest in  
351 experiments that directly measured reproductive output, with 90% reporting higher values for  
352 locals at some point in an experiment, followed by survival (67%), fitness indices that  
353 incorporated biomass (50%), and biomass measures (33%). For experiments in which only  
354 “some” gardens showed local-does-best patterns (Fig. 4C, hashed bars), the percentage of  
355 gardens showing this trend was 40%, 50%, and 40% for reproduction, survival, and biomass  
356 traits, respectively (not shown). For experiments in which only “some” sampling dates showed  
357 local-does-best patterns (gray bars), the percentage of sampling dates showing this trend was  
358 56%, 47%, and 25% for reproduction, survival, and biomass traits, respectively (not shown).

#### 359 *Considering possible biases: highly-studied species and maternal effects*

360       The average number of experiments per species in our dataset ranged from 1 (52 species)  
361 to 25 (*Artemisia tridentata*), with an average of 3.2 and standard deviation of 4.3. A given



362 species was considered ‘highly studied’ if the number of experiments representing it was more  
363 than 1 standard deviation above the average ( $3.2+4.3=7.5$ ), and 9 species met this criterion  
364 (*Artemisia tridentata*, 25, *Elymus elymoides*, 24, *Ericameria nauseosa*, 17, *Achnatherum*  
365 *hymenoides*, 17, *Krascheninnikovia lanata*, 13, *Pascopyrum smithii*, 11, *Atriplex canescens*, 9,  
366 *Leymus cinereus*, 9, and *Poa secunda*, 8). Results in which scores were averaged for each species  
367 were similar to uncorrected results: signature 1 was 4% higher when corrected (98% vs. 94%),  
368 signature 2 was 1% lower when corrected (79% vs. 80%), and signature 3 was 8% higher when  
369 corrected (78% vs. 70%).

370         Only 19 experiments (5.8%) used an experimental design that could control for maternal  
371 effects (e.g. growing all populations for a generation in a common environment before initiating  
372 an experiment). An additional 30 experiments (9.2%) were unclear on this point, and the  
373 remaining 278 (85%) experimented directly on populations differing in maternal environment.  
374 The incidence of population differences (signature 1) was 100% in the 16 experiments that  
375 moderated maternal effects, 95% for the 259 that did not make an attempt, and 97% for the 30  
376 which were unclear. Too few of the experiments that attempted to control for maternal effects  
377 were appropriate for measuring signature 2 (4 experiments) and signature 3 (1 experiment) to  
378 compare incidences of these signatures.

### 379 *Quantitative comparison of trait-by-environment associations*

380         Overall, we recovered positive relationships between the magnitude of differences among  
381 populations in all eight phenotypic traits and the magnitude of differences between MAT and  
382 MAP at the collection locations (Fig. 7). The strongest relationship was observed between  
383 differences in flowering time and differences in MAT, and leaf size also showed a strong  
384 relationship with MAT. Multiple strong relationships were observed between trait/environment

385 divergence for MAP, with leaf size, survival, shoot mass, inflorescence number, and flowering  
386 time all showing strongly positive relationships for grasses, forbs, and shrubs. (Fig. 7, Supporting  
387 Information Appendix S3). Regression analyses demonstrated that, for the 15 experiments in  
388 which strong flowering time and MAT relationships were observed, each degree change in MAT  
389 between population origins resulted in a median change of 4.4 days (IQR = 2.5, 5.7) in flowering  
390 time. Small sample sizes (few qualifying experiments) and challenges with interpreting changes  
391 in physical traits across species of various shapes and sizes precluded the presentation of  
392 estimates of this nature for the other strong trait-by-environment relationships we detected.

### 393 **Discussion**

394 Our results represent the most extensive review of intraspecific variation and local  
395 adaptation for plants native to the floristic Great Basin, a region comprised of largely continuous  
396 but increasingly imperiled arid and semi-arid plant communities (Davies *et al.*, 2011; Finch *et*  
397 *al.*, 2016). Additionally, they represent a significant addition to the noteworthy though relatively  
398 small number of reviews investigating this topic in a manner that identifies individual traits and  
399 environmental factors involved. We found that Great Basin plant species contain large amounts  
400 of intraspecific diversity in a wide range of phenotypic traits, that differences in these phenotypic  
401 traits are often associated with the heterogeneous environments of origin, and that differences  
402 among populations are commonly relevant to outplanting fitness. The importance of intraspecific  
403 variation may equal or exceed the importance of species diversity for the structure and  
404 functioning of communities and ecosystems (Des Roches *et al.*, 2018), and our quantification of  
405 local adaptation and trait-environment associations should serve as encouragement to seriously  
406 consider intraspecific diversity in native plant materials used in restoration and conservation in  
407 this region throughout the selection, evaluation, and development process (Basey, Fant and

408 Kramer, 2015). The results reported here should also serve as a cautionary note to restoration  
409 approaches that focus on only a few specific traits or the search for general-purpose genotypes.  
410 Our results suggest that, in the absence of species-specific information to the contrary, it is  
411 reasonable to assume that local adaptation is present in this region, and that locally-sourced  
412 populations would outperform non-local populations a majority of the time.

413         Our investigation encompassed 170 studies published between 1940 and 2017 in which  
414 over 3,230 unique populations of 104 native Great Basin plant species were compared in 327  
415 experiments, ranging from laboratory germination trials to multiple-year common gardens and  
416 reciprocal transplants. The great majority (95%) found differences between populations  
417 (signature 1) in the majority of traits measured in a common environment, which indicates that a  
418 diversity of traits are variable among populations, at both small and large geographic scales.  
419 Additionally, a clear majority (81.4%) of experiments found trait-by-collection environment  
420 associations (signature 2), suggesting that intraspecific variation is frequently an adaptive  
421 outcome of natural selection in heterogeneous environments (Linhart and Grant, 1996; Reich *et*  
422 *al.*, 2003). In experiments suitable for detecting local performance advantages (signature 3), local  
423 populations had higher performance (measured by differences in reproductive output, survival,  
424 and biomass) than nonlocal populations more often than not (69.2%), and this was particularly  
425 true when researchers reported traits related to reproductive output (90%). The overall incidence  
426 of “local does best” in the Great Basin is similar to or higher than other reviews that have found  
427 local adaptation to be commonplace, but not ubiquitous. In a review of local adaptation in plants  
428 that compared survival, reproduction, biomass and germination traits in reciprocal transplants,  
429 Leimu and Fischer (Leimu and Fischer, 2008) found that local plants outperformed non-local  
430 ones in 71% of 35 published experiments. Similarly, Hereford (Hereford, 2009) quantified local

431 adaptation in 70 published studies (50 of them plants), reporting only survival or reproductive  
432 traits, and found evidence of local adaptation in 65-71% of experiments. Our results indicated  
433 that the strongest indication of local adaptation came from experiments that directly measured  
434 reproductive output, and that using biomass as a fitness proxy may not be an effective way to  
435 compare relative performance in the Great Basin. This is consistent with a previous study that  
436 demonstrated selection for smaller, rather than larger, individuals in disturbed arid systems  
437 (Kulpa and Leger, 2013). Meta-analyses conducted across biomes may occlude regionally-  
438 important trait differentiation and mask patterns of local adaptation, as we might expect, for  
439 example, biomass to be more strongly linked to fitness in regions where light is a contested  
440 resource (Espeland, Johnson and Horning, 2017).

441         There are many processes that can reduce or prevent the development of local adaptation,  
442 such as the lack of divergent selection between sites, high gene flow, rapid or extreme  
443 environmental change, high phenotypic plasticity, and/or low genetic diversity (Sultan and  
444 Spencer, 2002; Kawecki and Ebert, 2004; Blows and Hoffmann, 2005). The high incidence of  
445 intraspecific variation, much of it habitat-correlated, that we found in the literature confirms that  
446 divergent selection by heterogeneous environments is the norm for species native to the Great  
447 Basin, presumably outweighing the balancing effects of gene flow and genetic drift. Key  
448 environmental factors in the Great Basin such as fire frequency, grazing regimes, resource  
449 availability, and climate are certainly being altered to varying degrees by invasive species  
450 introductions, changing land uses, and climate change, and it can be argued that such changes  
451 could outpace the ability of local populations to remain adapted to their surroundings (Jones and  
452 Monaco, 2009; Breed *et al.*, 2013; Havens *et al.*, 2015; Kilkenny, 2015). However, our analysis  
453 also demonstrated relatively high instances of trait correlations with relatively recent

454 disturbances such as invasive species introductions. Rapid evolution in response to invasive  
455 species (Oduor, 2013) and other anthropogenic changes (Hoffmann and Sgrò, 2011; Franks,  
456 Weber and Aitken, 2014) has been documented for many species, indicating that local adaptation  
457 can evolve rapidly in some circumstances.

458         Some traits and environmental characteristics stood out as particularly important  
459 indicators of local adaptation and its signatures across the studied taxa. For example, in our  
460 quantitative comparison and regression of divergence in traits and environments, flowering  
461 phenology was strongly affected by mean annual temperature (MAT), with a median change of  
462 4.4 days in flowering time per degree change in MAT of collection origin. Flowering phenology,  
463 along with germination phenology, were also in the top tier of frequently measured traits that  
464 showed significant correlations with environmental variables, consistent with other studies that  
465 have shown reproductive (Bucharova, Michalski, *et al.*, 2017) and germination (Donohue *et al.*,  
466 2010) phenology to be an important response to environmental variation. Leaf size is also an  
467 important adaptive response to differences in temperature globally (Wright *et al.*, 2017), and in  
468 concert with this, we saw overall positive responses to MAP and MAT for leaf size in our  
469 analyses as well as frequent trait-by-environment associations in the literature. Floral structure,  
470 which has important adaptive significance for angiosperms (Harder and Barrett, 2007;  
471 Armbruster, 2014), was among the most frequent traits scored for among-population variation  
472 and trait-by-environment interactions. Seasonality of precipitation, which varies in this region  
473 depending on summer rainfall (Comstock and Ehleringer, 1992), was more predictive of trait  
474 variation overall than was mean annual precipitation (signature 2). In our quantitative  
475 comparisons, differences in MAP values were important for multiple phenotypic traits, including  
476 leaf size, shoot mass, reproductive output, and flowering phenology, in addition to being

477 important for overall plant survival. Larger scale environmental descriptors, such as ecoregions  
478 and seed transfer zones, universally demonstrated signature 2, likely because they were  
479 developed based on climate/soil/vegetation associations or, in the case of seed transfer zones,  
480 developed based on trait-by-environment correlations. As found in other reviews (Geber and  
481 Griffen, 2003), physiological traits, phytochemical traits, and root traits were not measured as  
482 frequently as other traits, and though these did not show as frequent associations with  
483 environmental characteristics as other traits, they are known to vary across environments in some  
484 systems (Reich *et al.*, 2003). Additional studies of these traits in the Great Basin would be  
485 informative and could reveal different patterns than those observed here.

486         As in any review and analysis of published papers, there are elements of our design that  
487 were difficult to control. For example, consistent with other reviews (Gibson *et al.*, 2016), the  
488 vast majority of studies involved wild-collected plants or seeds, and thus maternal environment  
489 effects almost certainly affected some results (e.g. Bischoff and Müller-Schärer, 2010; Espeland  
490 *et al.*, 2016). Additionally, though the majority of populations tested in the literature were from  
491 western states, some of the populations compared in the literature were collected from well  
492 outside of the Great Basin, which increased the likelihood of observing local adaptation in these  
493 species. However, understanding patterns of intraspecific variation across the full range of the  
494 species native to the Great Basin is pertinent because it has been common (and for some species,  
495 ubiquitous) to utilize sources of native species originating from outside the Great Basin to use for  
496 restoration within the Great Basin (Jones and Larson, 2005). Finally, the scores and percentages  
497 for each of the signatures used throughout this study are uncorrected for phylogeny, as is our  
498 pairwise trait/environment analysis, and calculated such that each experiment is weighed equally.  
499 This introduces the possibility for phylogenetic biases, in which closely related taxa represented

500 by many experiments affect the results more than less frequently studied taxa or groups of taxa.  
501 Though we did not conduct phylogenetic corrections for relatedness among taxa (Harvey and  
502 Pagel, 1991; de Bello *et al.*, 2015), our results were essentially identical for signatures 1-3 when  
503 we averaged results across species (scores differed by +3%, -1%, and +8%, respectively),  
504 suggesting that our lack of phylogenetic corrections are not unduly affecting our results. We  
505 present all species-specific information in Supporting Information Appendix S2 and available  
506 datasets section of the electronic supplementary material for further review.

507         Current approaches to seed sourcing in restoration and conservation include genetic (e.g.  
508 Williams, Nevill and Krauss, 2014), genecological (e.g. Johnson, Leger and Vance-Borland,  
509 2017), local-only (e.g. Erickson *et al.*, 2017), predictive (e.g. Prober *et al.*, 2015), and agronomic  
510 (e.g. United States House of Representatives Committee on Appropriations, 2014)) strategies, as  
511 well as strategies mixing several of these viewpoints (i.e. Rice and Emery, 2003; Rogers and  
512 Montalvo, 2004; Breed *et al.*, 2013; Havens *et al.*, 2015). These approaches vary in the degree to  
513 which they meet the needs of seed producers and land managers while balancing population  
514 differences that stem from adaptive evolution in different environments. The prevalence of local  
515 adaptation and its signatures found in our study justify and support incorporating existing best-  
516 practices (e.g. Basey, Fant and Kramer, 2015; Espeland *et al.*, 2017) for capturing and preserving  
517 important intraspecific variation into seed sourcing and plant production systems. For example,  
518 our results demonstrated a strong relationship between flowering time and mean annual  
519 temperature, so it would be wise to collect materials for research, evaluation, and testing from  
520 populations that vary in MAT, to collect seeds at multiple times to fully capture population  
521 variation in flowering time, and ensure that seeds are not transferred during restoration among  
522 sites that differ strongly in these characteristics. On the production side, best practices for seed

523 harvesting should include methods that avoid inadvertent selection on flowering time, either for  
524 reduced variation or for a directional shift away from the wild condition. Similarly, emergence  
525 date was correlated with environmental variation in many plants, so testing in common gardens  
526 should involve seeding trials in place of or in addition to using transplants, and evaluation trials  
527 should guard against inadvertent selection on emergence timing by randomly, rather than  
528 systematically, selecting individuals to use in transplant experiments. These examples are not  
529 exhaustive, but demonstrate how evidence revealed by this study regarding which traits and  
530 environmental factors are generally involved in adaptation in this region can be used to improve  
531 approaches to seed sourcing and restoration. Finally, we acknowledge that ours is not the first  
532 review and meta-analysis to affirm an abundance of intraspecific variation and local adaptation  
533 in plants. However, its focus on the Great Basin is important, because the large and frequent yet  
534 commonly unsuccessful restoration efforts occurring in this region have lagged behind those of  
535 other regions with respect to recognizing the importance of intraspecific variation and local  
536 adaptation on outplanting success.

## 537 **Conclusions**

538 Reestablishing and maintaining native plant communities in arid regions has proven  
539 challenging (Svejcar *et al.*, 2017), and the lack of practical knowledge guiding more appropriate  
540 selection of seed sources is a major barrier (Friggens *et al.*, 2012; Gibson *et al.*, 2016). The  
541 forestry industry has long adopted the principles of local adaptation in their reforestation  
542 guidelines with great success (Matyas, 1996; Johnson *et al.*, 2004; Aitken and Bemmels, 2016),  
543 and similar approaches to restoration in the rangelands of the Great Basin may also increase  
544 success as our data support similarly high levels of population differentiation within grass, forb  
545 and shrub life history groups. Our results are in agreement with observations of local adaptation



546 in plant populations world-wide, and further, we identified particular phenotypic traits (flowering  
547 and germination phenology, floral structures, leaf size, biomass, survival, and reproductive  
548 output), environmental characteristics (MAT, MAP, climate metrics, seasonality), and habitat  
549 classifications and site history (seed zones, ecoregions, history of invasive species) that were  
550 important predictors of local adaptation in this arid floristic region. Given the speed and severity  
551 with which natural communities are being altered by anthropogenic factors, the application of an  
552 evolutionary perspective to restoration ecology is more important than ever. Adjusting seed-  
553 selection priorities to account for the existence of locally adapted, intraspecific variation in the  
554 Great Basin will promote the maintenance and recovery of resilient, self-sustaining vegetation  
555 communities in this region (Meyer, 1997; Lesica and Allendorf, 1999; Rogers and Montalvo,  
556 2004; Broadhurst *et al.*, 2008; Vander Mijnsbrugge, Bischoff and Smith, 2010).

## 557 **Acknowledgements**

558 We would like to acknowledge Vicki Thill and Sage Ellis for many hours of extracting  
559 coordinates and trait data, as well as Susan Meyer, Andrea Kramer, Tom Jones, Vicky Erickson,  
560 Allan Stevens, Dan Atwater, Clinton Shock, Jessica Irwin, Huixuan Liao, and David Solance  
561 Smith for providing information and data not available in their publications.

## 562 **Dedication**

563 We would like to dedicate this paper to the memory of our co-author, Dr. Erin K.  
564 Espeland, friend and collaborator to all of us who worked on this manuscript. Erin's light and life  
565 will never be forgotten by those who knew her, and we want to recognize her creative  
566 contributions to the field of plant ecology, including this effort. Erin is dearly missed.

## 567 **Funding**

568 This project was funded by a grant from the United States Department of the Interior

569 Great Basin Landscape Conservation Cooperative (2016-Kilkenny/Leger), which provided  
570 support for EAL and OWB. Additionally, ACA was supported by a grant from the United States  
571 Department of Agriculture National Institute of Food and Agriculture; EE was supported by  
572 United States congressional appropriation 3032-21220-002-00-D; FFK and JEO were supported  
573 by the Great Basin Native Plant Project, the United States Department of the Interior Bureau of  
574 Land Management, and the United States Department of Agriculture Forest Service; JBS and  
575 MEH were supported by the United States Department of Agriculture Forest Service; MLF was  
576 supported by a Trevor James McMinn fellowship; RCJ was supported by the Great Basin Native  
577 Plant Project; RF was supported by the Institute for Applied Ecology; and TMK was supported  
578 by the United States Department of the Interior Bureau of Land Management and the Institute for  
579 Applied Ecology;

#### 580 **Data accessibility**

581 Raw datasets and statistical code supporting this study (Baughman *et al.*, 2018) have been  
582 deposited at Dryad, [<https://doi.org/10.5061/dryad.v73d5nd>]

#### 583 **Authors' contributions**

584 EAL, OWB, FFK, EKE, RF, TNK, and JBS conceived and designed the study; OWB  
585 conducted the literature search; OWB, ACA, FFK, JEO, RCJ, and JBS categorized, compiled  
586 and extracted data; OWB, EAL, FFK, ACA and MLF analyzed data; OWB, EAL, and ACA  
587 drafted the manuscript; all authors critically revised the manuscript for important intellectual  
588 content and approved of the version to be published.

589

590 **References**

- 591 Ackerly, D. D. *et al.* (2000) 'The Evolution of Plant Ecophysiological Traits: Recent Advances  
592 and Future Directions', *AIBS Bulletin*, pp. 979–995. doi: 10.1641/0006-  
593 3568(2000)050[0979:teopet]2.0.co;2.
- 594 Aitken, S. N. and Bemmels, J. B. (2016) 'Time to get moving: Assisted gene flow of forest  
595 trees', *Evolutionary Applications*, pp. 271–290. doi: 10.1111/eva.12293.
- 596 Anderson, J. T. *et al.* (2012) 'Phenotypic plasticity and adaptive evolution contribute to  
597 advancing flowering phenology in response to climate change', *Proceedings of the Royal Society*  
598 *of London B: Biological Sciences*. doi: 10.1098/rspb.2012.1051.
- 599 Antonovics, J. and Bradshaw, A. (1968) 'Evolution in closely adjacent plant populations',  
600 *Heredity*, 23(4), pp. 507–524. doi: 10.1038/hdy.1970.36.
- 601 Armbruster, W. (2014) 'Floral specialization and angiosperm diversity: phenotypic divergence,  
602 fitness trade-offs and realized pollination accuracy', *AoB Plants*, 6.
- 603 Barkworth, M. *et al.* (2018) 'US Virtual Herbarium'. Available at: <http://usvhproject.org/#/>.
- 604 Barnes, M. (2009) 'The effect of plant source location on restoration success: a reciprocal  
605 transplant experiment with winterfat (*Krascheninnikovia lanata*)', *Doctoral Dissertation. The*  
606 *University of New Mexico*. Available at: [http://digitalrepository.unm.edu/biol\\_etds/4](http://digitalrepository.unm.edu/biol_etds/4) (Accessed:  
607 8 January 2018).
- 608 Basey, A. C., Fant, J. B. and Kramer, A. T. (2015) 'Producing native plant materials for  
609 restoration: 10 rules to collect and maintain genetic diversity', *Native Plants Journal*, 16(1), pp.  
610 37–53. doi: 10.3368/npj.16.1.37.
- 611 Baughman, O. *et al.* (2018) 'Data from: Strong Patterns of Intraspecific Variation and Local  
612 Adaptation in Great Basin Plants Revealed Through 75 Years of Experiments', *Dryad Digital*  
613 *Repository*. doi: 10.5061/dryad.v73d5nd.
- 614 de Bello, F. *et al.* (2015) 'On the need for phylogenetic “corrections” in functional trait-based  
615 approaches', *Folia Geobotanica*, 50, pp. 349–357. doi: 10.1007/s12224-015-9228-6.

- 616 Bischoff, A. and Müller-Schärer, H. (2010) ‘Testing population differentiation in plant species -  
617 How important are environmental maternal effects’, *Oikos*, 119(3), pp. 445–454. doi:  
618 10.1111/j.1600-0706.2009.17776.x.
- 619 Blanquart, F. *et al.* (2013) ‘A practical guide to measuring local adaptation’, *Ecology Letters*, pp.  
620 1195–1205. doi: 10.1111/ele.12150.
- 621 Blows, M. W. and Hoffmann, A. A. (2005) ‘A reassessment of genetic limits to evolutionary  
622 change’, *Ecology*, pp. 1371–1384. doi: 10.1890/04-1209.
- 623 Bower AD, Clair JBS, Erickson V. 2014 Generalized provisional seed zones for native plants.  
624 *Ecol. Appl.* 24, 913–919. (doi:10.1890/13-0285.1)
- 625 Breed, M. F. *et al.* (2013) ‘Which provenance and where? Seed sourcing strategies for  
626 revegetation in a changing environment’, *Conservation Genetics*, 14(1), pp. 1–10. doi:  
627 10.1007/s10592-012-0425-z.
- 628 Broadhurst, L. M. *et al.* (2008) ‘Seed supply for broadscale restoration: Maximizing evolutionary  
629 potential’, *Evolutionary Applications*, 1(4), pp. 587–597. doi: 10.1111/j.1752-  
630 4571.2008.00045.x.
- 631 Bucharova, A., Durka, W., *et al.* (2017) ‘Are local plants the best for ecosystem restoration? It  
632 depends on how you analyze the data’, *Ecology and Evolution*, 7(24), pp. 10683–10689. doi:  
633 10.1002/ece3.3585.
- 634 Bucharova, A., Michalski, S., *et al.* (2017) ‘Genetic differentiation and regional adaptation  
635 among seed origins used for grassland restoration: lessons from a multispecies transplant  
636 experiment’, *Journal of Applied Ecology*, 54(1), pp. 127–136. doi: 10.1111/1365-2664.12645.
- 637 Chivers, I. H. *et al.* (2016) ‘The merits of artificial selection for the development of restoration-  
638 ready plant materials of native perennial grasses’, *Restoration Ecology*, 24(2), pp. 174–183. doi:  
639 10.1111/rec.12323.
- 640 Clausen, J., Keck, D. and Hiesey, W. (1948) ‘Experimental studies on the nature of species. III.  
641 Environmental responses of climatic races of *Achillea*’, *Carnegie Institution of Washington*, 581,  
642 pp. 1–129.

- 643 Comstock, J. P. and Ehleringer, J. R. (1992) 'Correlating genetic variation in carbon isotopic  
644 composition with complex climatic gradients.', *Proceedings of the National Academy of  
645 Sciences*, 89(16), pp. 7747–7751. doi: 10.1073/pnas.89.16.7747.
- 646 Davies, K. W. *et al.* (2011) 'Saving the sagebrush sea: An ecosystem conservation plan for big  
647 sagebrush plant communities', *Biological Conservation*, 144(11), pp. 2573–2584. doi:  
648 10.1016/j.biocon.2011.07.016.
- 649 Dennison, P. E. *et al.* (2014) 'Large wildfire trends in the western United States, 1984–2011',  
650 *Geophysical Research Letters*, 41(8), pp. 2928–2933. doi: 10.1002/2014GL059576.
- 651 Donohue, K. *et al.* (2010) 'Germination, postgermination adaptation, and species ecological  
652 ranges', *Annual Review of Ecology, Evolution, and Systematics*, 41, pp. 293–319.
- 653 Endler, J. A. (1986) *Natural selection in the wild*, *Monographs in Population Biology*. doi:  
654 10.2307/302397.
- 655 Erickson, T. E. *et al.* (2017) 'Benefits of adopting seed-based technologies for rehabilitation in  
656 the mining sector: a Pilbara perspective', *Australian Journal of Botany*. doi: 10.1071/BT17154.
- 657 Erickson, V. J., Mandel, N. L. and Sorenson, F. C. (2004) 'Landscape patterns of phenotypic  
658 variation and population structuring in a selfing grass, *Elymus glaucus* (blue wildrye)', *Canadian  
659 Journal of Botany*, 82(12), pp. 1776–1789. doi: 10.1139/B04-141.
- 660 Espeland, E. K. *et al.* (2016) 'Perennial grass cultivars grown at different production farms  
661 respond differently to storage and planting environments', *Crop Science*, 56, pp. 249–258. doi:  
662 10.2135/cropsci2015.05.0318.
- 663 Espeland, E. K. *et al.* (2017) 'Evolution of plant materials for ecological restoration: Insights  
664 from the applied and basic literature', *Journal of Applied Ecology*, 54, pp. 102–115. doi:  
665 10.1111/1365-2664.12739.
- 666 Espeland, E. K., Johnson, R. C. and Horning, M. E. (2017) 'Plasticity in native perennial grass  
667 populations: Implications for restoration', *Evolutionary Applications*, 00, pp. 1–10. doi:  
668 10.1111/eva.12560.

- 669 Evans, R. A. and Young, J. A. (1990) 'Survival and Growth of Big Sagebrush (*Artemisia*  
670 *tridentata*) Plants in Reciprocal Gardens', *Weed Science*, 38(3), pp. 215–219. doi:  
671 10.2307/4045014.
- 672 Finch, D. M. *et al.* (2016) 'Conservation and Restoration of Sagebrush Ecosystems and Sage-  
673 Grouse: An Assessment of USDA Forest Service Science', *General technical report*, RMRS-  
674 GTR-3(US Department of Agriculture, Forest Service, Rocky Mountain Research Station).  
675 Available at: [https://www.fs.fed.us/rm/pubs/rmrs\\_gtr348.pdf](https://www.fs.fed.us/rm/pubs/rmrs_gtr348.pdf).
- 676 Franks, S. J., Weber, J. J. and Aitken, S. N. (2014) 'Evolutionary and plastic responses to climate  
677 change in terrestrial plant populations', *Evolutionary Applications*, 7(1), pp. 123–139. doi:  
678 10.1111/eva.12112.
- 679 Friggens, M. M. *et al.* (2012) 'Decision support: Vulnerability, conservation, and restoration  
680 (Chapter 8)', *USDA Forest Service, Rocky Mountain Research Station - General Technical*  
681 *Report*, (RMRS-GTR-285), pp. 116–139. Available at:  
682 [http://www.scopus.com/inward/record.url?eid=2-s2.0-](http://www.scopus.com/inward/record.url?eid=2-s2.0-84865151549&partnerID=40&md5=7e0d86d3567ac2ed6c834c0d831cbdca)  
683 [84865151549&partnerID=40&md5=7e0d86d3567ac2ed6c834c0d831cbdca](http://www.scopus.com/inward/record.url?eid=2-s2.0-84865151549&partnerID=40&md5=7e0d86d3567ac2ed6c834c0d831cbdca).
- 684 Geber, M. A. and Griffen, L. R. (2003) 'Inheritance and Natural Selection on Functional Traits',  
685 *International Journal of Plant Sciences*, 164(S3), pp. S21–S42. doi: 10.1086/368233.
- 686 Gibson, A. L. *et al.* (2016) 'Can local adaptation research in plants inform selection of native  
687 plant materials? An analysis of experimental methodologies', *Evolutionary Applications*, 9(10),  
688 pp. 1219–1228. doi: 10.1111/eva.12379.
- 689 Google Inc. 2018 Google Earth (Version 7.1.8.3036)  
690 See: <https://www.google.com/earth/desktop/>
- 691 Harder, L. D. and Barrett, S. C. H. (2007) *Ecology and evolution of flowers*. New York: Oxford  
692 University Press.
- 693 Harvey, P. H. and Pagel, M. D. (1991) 'The comparative method in evolutionary biology',  
694 *Oxford Series in Ecology and Evolution*, p. 239. doi: 10.1016/0169-5347(92)90117-T.
- 695 Havens, K. *et al.* (2015) 'Seed Sourcing for Restoration in an Era of Climate Change', *Natural*

- 696 *Areas Journal*, 35(1), pp. 122–133. doi: 10.3375/043.035.0116.
- 697 Hereford, J. (2009) ‘A Quantitative Survey of Local Adaptation and Fitness Trade-Offs’, *The*  
698 *American Naturalist*, 173(5), pp. 579–588. doi: 10.1086/597611.
- 699 Hoffmann, A. A. and Sgrò, C. M. (2011) ‘Climate change and evolutionary adaptation.’, *Nature*,  
700 470(7335), pp. 479–485. doi: 10.1038/nature09670.
- 701 Johnson, G. *et al.* (2004) ‘Pacific Northwest Forest Tree Seed Zones: A Template for Native  
702 Plants?’, *Native Plants Journal*, 5, pp. 131–140. doi: 10.2979/NPJ.2004.5.2.131.
- 703 Johnson, R. *et al.* (2010) ‘What are the best seed sources for ecosystem restoration on BLM and  
704 USFS lands?’, *Native Plants Journal*, 11(2), pp. 117–131. doi: 10.2979/NPJ.2010.11.2.117.
- 705 Johnson, R. C., Leger, E. A. and Vance-Borland, K. (2017) ‘Genecology of Thurber’s  
706 Needlegrass (*Achnatherum thurberianum* [Piper] Barkworth) in the Western United States’,  
707 *Rangeland Ecology & Management*. the Society for Range Management, 70(4), pp. 509–517.  
708 doi: 10.1016/j.rama.2017.01.004.
- 709 Jones, T. A. and Larson, S. R. (2005) ‘Status and use of important native grasses adapted to  
710 sagebrush communities’, in *Shaw, Nancy L.; Pellant, Mike; Monsen, Stephen B., comps. Sage-*  
711 *grouse habitat restoration symposium proceedings; 2001 June 4-7, Boise, ID. Proc. RMRS-P-38.*  
712 Fort Collins, CO: U.S. Department of Agriculture, Forest Service, Rocky Mountain Research  
713 Station., pp. 49–55.
- 714 Jones, T. A. and Monaco, T. A. (2009) ‘A role for assisted evolution in designing native plant  
715 materials for domesticated landscapes’, *Frontiers in Ecology and the Environment*, 7(10), pp.  
716 541–547. doi: 10.1890/080028.
- 717 Jones, T. A., Monaco, T. A. and Rigby, C. W. (2015) ‘The potential of novel native plant  
718 materials for the restoration of novel ecosystems’, *Elementa: Science of the Anthropocene*, 3,  
719 doi: 10.12952/journal.elementa.000047.
- 720 Kawecki, T. and Ebert, D. (2004) ‘Conceptual issues in local adaptation’, *Ecology Letters*, 7(12),  
721 pp. 1225–1241.

- 722 Kilkenny, F. F. (2015) ‘Genecological Approaches to Predicting the Effects of Climate Change  
723 on Plant Populations’, *Natural Areas Journal*, 35(1), pp. 152–164. doi: 10.3375/043.035.0110.
- 724 Kramer, A. T., Larkin, D. J. and Fant, J. B. (2015) ‘Assessing potential seed transfer zones for  
725 five forb species from the Great Basin Floristic Region, USA’, *Natural Areas Journal*, 35(1).  
726 doi: 10.3375/043.035.0119.
- 727 Kulpa, S. M. and Leger, E. A. (2013) ‘Strong natural selection during plant restoration favors an  
728 unexpected suite of plant traits’, *Evolutionary Applications*, 6(3), pp. 510–523. doi:  
729 10.1111/eva.12038.
- 730 Laliberté, E. (2011) ‘metacor: Meta-analysis of correlation coefficients’, *R package 1.0-2*.  
731 Available at: <https://cran.r-project.org/package=metacor>.
- 732 Langlet, O. (1971) ‘Two Hundred Years Genecology’, *Taxon*. International Association for Plant  
733 Taxonomy (IAPT), 20(5/6), pp. 653–721. doi: 10.2307/1218596.
- 734 Larsen, E. C. (1947) ‘Photoperiodic Responses of Geographical Strains of *Andropogon*  
735 *scoparius*’, *Botanical Gazette*, 109(2), pp. 132–149. doi: 10.1086/335463.
- 736 Leger, E. A. and Baughman, O. W. (2015) ‘What seeds to plant in the Great Basin? Comparing  
737 traits prioritized in native plant cultivars and releases with those that promote survival in the  
738 field’, *Natural Areas Journal*, 35(1), pp. 54–68. doi: 10.3375/043.035.0108.
- 739 Leimu, R. and Fischer, M. (2008) ‘A meta-analysis of local adaptation in plants’, *PLoS ONE*,  
740 3(12), p. e4010. doi: 10.1371/journal.pone.0004010.
- 741 Lesica, P. and Allendorf, F. W. (1999) ‘Ecological Genetics and the Restoration of Plant  
742 Communities: Mix or Match?’, *Restoration Ecology*, 7(1), pp. 42–50. doi: 10.1046/j.1526-  
743 100X.1999.07105.x.
- 744 Linhart, Y. B. and Grant, M. C. (1996) ‘Evolutionary Significance of Local Genetic  
745 Differentiation in Plants’, *Annual Review of Ecology and Systematics*, 27(1), pp. 237–277. doi:  
746 10.1146/annurev.ecolsys.27.1.237.
- 747 Loveless, M. D. and Hamrick, J. L. (1984) ‘Ecological Determinants of Genetic Structure in



- 748 Plant Populations’, *Annual Review of Ecology and Systematics*, 15(1), pp. 65–95. doi:  
749 10.1146/annurev.es.15.110184.000433.
- 750 Matyas, C. (1996) ‘Climatic adaptation of trees: rediscovering provenance tests’, *Euphytica*, Jan  
751 1(92 (1-2)), pp. 45–54.
- 752 McArthur, E. D., Meyer, S. E. and Weber, D. J. (1987) ‘Germination rate at low temperature:  
753 Rubber rabbitbrush population differences’, *Journal of Range Management*, 40(6), pp. 530–533.  
754 doi: 10.2307/3898874.
- 755 McArthur, E. D. and Young, S. A. (1999) ‘Development of native seed supplies to support  
756 restoration of pinyon-juniper sites’, in *S.B. Monsen and R. Stevens, compilers, Proceedings:  
757 ecology and management of pinyon-juniper communities within the Interior West. Proc. RMRS-  
758 P-9*. USDA Forest Service, Rocky Mountain Research Station, Ogden, UT, pp. 327–330.
- 759 McMillan, C. (1959) ‘The role of ecotypic variation in the distribution of the central grassland of  
760 North America’, *Ecological Monographs*, 29(4), pp. 285–308. doi: Genetic Considerations in  
761 Ecological Restoration.
- 762 Meyer, S. E. *et al.* (1995) ‘Germination ecophysiology of *Leymus cinereus* (Poaceae)’,  
763 *International Journal of Plant Sciences*, 156(2), pp. 206–215. doi: 10.1086/297242.
- 764 Meyer, S. E. (1997) ‘Genecological Considerations in Grassland Restoration Using Wild-  
765 Collected Seed Sources’, in *Proceesings of the 18th International Grassland Congress,  
766 Winnipeg and Saskatoon, Canada*, pp. 8–17. Available at:  
767 <http://www.internationalgrasslands.org/files/igc/publications/1997/iii-299.pdf> (Accessed: 8  
768 January 2018).
- 769 Meyer, S. E. and Monsen, S. B. (1991) ‘Habitat-correlated variation in mountain big sagebrush  
770 (*Artemisia tridentata* ssp. *vaseyana*) seed germination patterns’, *Ecology*, 72(2), pp. 739–742.  
771 doi: 10.2307/2937214.
- 772 Vander Mijnsbrugge, K., Bischoff, A. and Smith, B. (2010) ‘A question of origin: Where and  
773 how to collect seed for ecological restoration’, *Basic and Applied Ecology*, 11(4), pp. 300–311.  
774 doi: 10.1016/J.BAAE.2009.09.002.

- 775 Oduor, A. M. O. (2013) 'Evolutionary responses of native plant species to invasive plants: a  
776 review', *New Phytologist*, 200(4), pp. 986–992. doi: Doi 10.1111/Nph.12429.
- 777 Oksanen, J. *et al.* (2018) 'Vegan: community ecology package', *R package 2.4-6*. doi:  
778 10.4135/9781412971874.n145.
- 779 Pilliod, D. S., Welty, J. L. and Toevs, G. R. (2017) 'Seventy-Five Years of Vegetation  
780 Treatments on Public Rangelands in the Great Basin of North America', *Rangelands*, 39(1), pp.  
781 1–9. doi: 10.1016/j.rala.2016.12.001.
- 782 Plant Conservation Alliance, P. (2015) 'National Seed Strategy for Rehabilitation and  
783 Restoration 2015-2020'. Bureau of Land Management. Available at:  
784 [https://www.blm.gov/programs/natural-resources/native-plant-communities/national-seed-](https://www.blm.gov/programs/natural-resources/native-plant-communities/national-seed-strategy)  
785 [strategy](https://www.blm.gov/programs/natural-resources/native-plant-communities/national-seed-strategy).
- 786 Prober, S. M. *et al.* (2015) 'Climate-adjusted provenancing: a strategy for climate-resilient  
787 ecological restoration', *Frontiers in Ecology and Evolution*, 3, p. 65. doi:  
788 10.3389/fevo.2015.00065.
- 789 R Core Team (2017) 'R: A Language and Environment for Statistical Computing', *R Foundation*  
790 *for Statistical Computing*. Vienna. Available at: <https://www.r-project.org/>.
- 791 Reich, P. B. *et al.* (2003) 'The evolution of plant functional variation: traits, spectra, and  
792 strategies', *International Journal of Plant Sciences*, 164(S3), pp. S143–S164. doi:  
793 10.1086/374368.
- 794 Rice, K. J. and Emery, N. C. (2003) 'Managing microevolution: Restoration in the face of global  
795 change', *Frontiers in Ecology and the Environment*, 1(9), pp. 469–478. doi: 10.1890/1540-  
796 9295(2003)001[0469:MMRITF]2.0.CO;2.
- 797 Richards, R. T., Chambers, J. C. and Ross, C. (1998) 'Use of native plants on federal lands:  
798 policy and practice', *Journal of Range Management*, 51(6), pp. 625–632. doi: 10.2307/4003603.
- 799 Des Roches, S. *et al.* (2018) 'The ecological importance of intraspecific variation', *Nature*  
800 *Ecology & Evolution*, 2(1), pp. 57–64. doi: 10.1038/s41559-017-0402-5.

- 801 Rogers, D. L. and Montalvo, A. M. (2004) ‘Genetically appropriate choices for plant materials to  
802 maintain biological diversity’, in *University of California. Report to the USDA Forest Service,*  
803 *Rocky Mountain Region, Lakewood, CO.* doi: Genetic Considerations in Ecological Restoration.
- 804 Rohatgi A. 2017 WebPlotDigitizer: Web based tool to extract data from plots, images, and maps.  
805 See: <https://automeris.io/WebPlotDigitizer>
- 806 Rowland, M. M., Suring, L. H. and Michael, J. (2010) ‘Assessment of habitat threats to  
807 shrublands in the Great Basin: a case study’, *Advances in threat assessment and their application*  
808 *to forest and rangeland management. General Technical Report. PNW-GTR-802*, pp. 673–685.  
809 Available at: <http://www.northern-ecologic.com/publications/54.pdf>.
- 810 Sheridan, J. A. and Bickford, D. (2011) ‘Shrinking body size as an ecological response to climate  
811 change’, *Nature Climate Change*, 1(8), pp. 401–406. doi: 10.1038/nclimate1259.
- 812 Siepielski, A. M., Dibattista, J. D. and Carlson, S. M. (2009) ‘It’s about time: The temporal  
813 dynamics of phenotypic selection in the wild’, *Ecology Letters*, pp. 1261–1276. doi:  
814 10.1111/j.1461-0248.2009.01381.x.
- 815 St Clair, J. B., Mandel, N. L. and Vance-Borland, K. W. (2005) ‘Genecology of Douglas fir in  
816 Western Oregon and Washington’, *Annals of Botany*, 96(7), pp. 1199–1214. doi:  
817 10.1093/aob/mci278.
- 818 Sultan, S. E. and Spencer, H. G. (2002) ‘Metapopulation structure favors plasticity over local  
819 adaptation’, *The American Naturalist*, 160(2), pp. 271–283. doi: 10.1086/341015.
- 820 Svejcar, T. *et al.* (2017) ‘Challenges and limitations to native species restoration in the Great  
821 Basin, USA’, *Plant Ecology*, 218(1), pp. 81–94. doi: 10.1007/s11258-016-0648-z.
- 822 Tisdale, E. W. and Hironaka, M. (1981) ‘The Sagebrush-Grass Region: A Review of the  
823 Ecological Literature’, *University of Idaho Forest, Wildlife, and Range Experiment Station.*  
824 Available at: <http://digital.lib.uidaho.edu/cdm/ref/collection/fwres/id/169> (Accessed: 5 January  
825 2018).
- 826 Turesson, G. (1922) ‘The genotypical response of the plant species to the habitat’, *Hereditas*,  
827 3(3), pp. 211–350. doi: 10.1111/j.1601-5223.1922.tb02734.x.

828 United States House of Representatives Committee on Appropriations. (2014) ‘American Seed  
829 Trade Association Statement by Mark Mustoe, Co-Owner and Manager of Clearwater Seed  
830 Regarding Efficient Native Seed Use by the Bureau of Land Management’. Alexandria, VA.  
831 Available at: <http://docs.house.gov/meetings/AP/AP06/20140410/101762/HHRG-113-AP06->  
832 [Wstate-MustoeM-20140410.pdf](http://docs.house.gov/meetings/AP/AP06/20140410/101762/HHRG-113-AP06-Wstate-MustoeM-20140410.pdf) (Accessed: 4 January 2018).

833 US Geological Survey. 2018 Geographic Names Information System (GNIS). See:  
834 <http://geonames.usgs.gov/>

835 USDA and NRCS (2018) *The PLANTS Database, National Plant Data Team, Greensboro, NC*  
836 *27401-4901 USA*. Available at: <http://plants.usda.gov> (Accessed: 8 January 2018).

837 USDOJ (2015) *SO-3336: An Integrated Rangeland Fire Management Strategy. Final Report to*  
838 *the Secretary of the Interior*. Available at:  
839 [https://www.forestsandrangelands.gov/rangeland/documents/IntegratedRangelandFireManageme](https://www.forestsandrangelands.gov/rangeland/documents/IntegratedRangelandFireManagementStrategy_FinalReportMay2015.pdf)  
840 [ntStrategy\\_FinalReportMay2015.pdf](https://www.forestsandrangelands.gov/rangeland/documents/IntegratedRangelandFireManagementStrategy_FinalReportMay2015.pdf). [Accessed January 26, 2018].

841 Vavrek, M. J. (2011) ‘Fossil: palaeoecological and palaeogeographical analysis tools’,  
842 *Palaeontologia Electronica*, 14(1), p. 16.

843 Wang, T. *et al.* (2016) ‘Locally downscaled and spatially customizable climate data for historical  
844 and future periods for North America’, *PLoS ONE*, 11(6), p. e0156720. doi:  
845 [10.1371/journal.pone.0156720](https://doi.org/10.1371/journal.pone.0156720).

846 Ward, R. T. (1969) ‘Ecotypic variation in *Deschampsia caespitosa* (L.) Beauv. from Colorado’,  
847 *Ecology*, 50(3), pp. 519–522. doi: [10.2307/1933914](https://doi.org/10.2307/1933914).

848 Williams, A. V., Nevill, P. G. and Krauss, S. L. (2014) ‘Next generation restoration genetics:  
849 Applications and opportunities’, *Trends in Plant Science*, 19(8), pp. 529–537. doi:  
850 [10.1016/j.tplants.2014.03.011](https://doi.org/10.1016/j.tplants.2014.03.011).

851 Wright, I. J. *et al.* (2017) ‘Global climatic drivers of leaf size’, *Science*, 357(6354), pp. 917–921.  
852 doi: [10.1126/science.1247600](https://doi.org/10.1126/science.1247600).

853

854

855 Table 1. Traits measured in outdoor common gardens or reciprocal transplants for at least 5  
856 populations in at least 20 garden-specific experiments, with data available from text, tables,  
857 author contact, or extraction from figures. Note that in some cases, multiple highly similar  
858 measures were grouped, as indicated in footnotes.

859

| <b>Trait</b>                        | <b>Units</b> | <b>Garden-specific experiments</b> |
|-------------------------------------|--------------|------------------------------------|
| date – flowering <sup>1</sup>       | # days       | 34                                 |
| size – floral <sup>2</sup>          | cm           | 22                                 |
| height - plant                      | cm           | 46                                 |
| size – leaf <sup>3</sup>            | cm           | 30                                 |
| mass – shoots <sup>4</sup>          | g            | 43                                 |
| number - inflorescence <sup>5</sup> | #            | 36                                 |
| number – seeds <sup>6</sup>         | #            | 21                                 |
| survival                            | %            | 43                                 |

<sup>1</sup>Flowering date or any other floral phenology

<sup>2</sup>Any size measurement of a floral structure

<sup>3</sup>Most frequently, leaf length; occasionally leaf width

Any measure of aboveground biomass

Counts of flowers or flowering structures

Most frequently seed number, but also seed yield in mass and/or seed yield rating/rank

860

861

862 **Figure captions**

863 Figure 1. Summary of reviewed literature that compared traits among at least two populations in  
864 at least one common environment, by lifeform. Total counts of published studies, species, taxa,  
865 and taxa-specific experiments (A); types of experiments (B); means and standard errors of  
866 duration of the experiments that measured more than germination traits (C); total counts of  
867 experiments that measured only germination traits, (D); means and standard errors of number of  
868 populations tested in each experiment (E), and garden sites per experiment for outdoor reciprocal  
869 transplant and common garden experiments (F).

870  
871 Figure 2. Map of 129 different outdoor common garden locations (A) and 2953 unique  
872 population collection sites (B) for the 80% of outdoor gardens and 91% of experiments for which  
873 coordinates could be obtained or generated, from 170 studies reviewed. The size of the marker in  
874 panel A represents the number of experiments in which each specific garden location was used,  
875 with larger symbols indicating garden locations used in more experiments. Although all species  
876 represented are native to the floristic Great Basin (white outline), many populations were  
877 collected and tested outside this region.

878  
879 Figure 3. Summary of the years in which the collections of each experiment were made (A, left),  
880 the year each experiment was performed (A, right), and the average geographic distance among  
881 population collections sites in each experiment. The percent of 327 experiments that reported this  
882 information were 99% and 88% (respectively) for panel A, and 80% for panel B. Collection year  
883 and experiment year represent the average for each experiment, as it was common for materials  
884 to be collected and tested over multiple years for each experiment. Geographic distance is the

885 mean pairwise distance among populations in each experiment; note the noncontinuous vertical  
886 axis.

887

888 Figure 4. Frequency of among-population variation (A, signature 1) and trait-by-environment  
889 associations (B, signature 2) for any measured trait, grouped by five life history traits. Frequency  
890 of local advantage (C, signature 3) for reproductive traits, survival traits, fitness indices, or  
891 biomass. Data compiled from 327 experiments from 170 published studies on Great Basin plants  
892 (see Supporting Information Appendix S2 and available datasets in electronic supplementary  
893 material). For signatures 1 and 2, “Yes” and “No” represent statistical comparisons, while  
894 “Authors claim “Yes”” and “Authors claim “No”” represent textual, claim-based results where  
895 supporting statistics were not reported (common in older studies). For signature 3, most  
896 experiments had multiple gardens, and many evaluated performance at multiple sampling dates,  
897 leading to 5 different scores. These scores, from “All gardens, all times” to “No gardens at any  
898 time” represent a gradient of incidence and frequency of this signature. For all panels, numbers  
899 in parentheses, (x), indicate the number of experiments scored in a given category, and the  
900 dashed gray lines indicate 50%.

901

902 Figure 5. Summary of 1,465 trait scores from the 305 experiments appropriate for detecting  
903 signature 1 (differences between populations). Scores of “Yes” and “No” were supported by  
904 statistical comparisons, while the “Authors claim...” scores represent textual, claim-based results  
905 where supporting statistics were not reported (common in older studies). Numbers in  
906 parentheses, (x), indicate the total experiments that measured each trait or reported each factor,  
907 and dashed gray line indicates 50%.

908  
909 Figure 6. Summary of scores for associations between 592 traits (A) and 426 environmental  
910 factors (B) from the 161 experiments appropriate for detecting signature 2 (trait-by-environment  
911 association), expressed by trait/factors, and an example from the literature (C, redrawn with  
912 permission from (Meyer and Monsen, 1991)) in which date of germination for mountain big  
913 sagebrush is correlated with a measure of monthly temperature (treatment: 2-week chill). Scores  
914 of “Yes” and “No” were supported by statistical comparisons, while the “Authors claim...”  
915 scores represent textual, claim-based results where supporting statistics were not reported  
916 (common in older studies). For panels A and B, numbers in parentheses, (x), indicate the total  
917 experiments that measured each trait or reported each factor, and the dashed gray lines indicate  
918 50%.

919  
920 Figure 7. Results of comparisons of pairwise trait and environmental distances for eight  
921 frequently measured phenotypic traits and (A) the mean annual precipitation (MAP) or (B) mean  
922 annual temperature (MAT) at the original collection location. Values are effect sizes and 95%  
923 confidence intervals for each trait, averaged across all experiments for which data were available  
924 (number of experiments in parentheses). Examples of the two strongest relationships are shown  
925 for leaf size and MAP (C), where each line shows the correlation coefficient and confidence  
926 intervals for an individual experiment, for which we calculated the relationship between  
927 differences in percent survival and difference MAP at location of origin. Color indicates  
928 functional groups: Green = grasses, blue = shrubs, orange = forbs. Examples are shown for the  
929 two highest effect sizes: D), experiment 297A, (Kramer, Larkin and Fant, 2015), *Penstemon*  
930 *deustus* and E), experiment 297A, (Kramer, Larkin and Fant, 2015), *Eriogonum microthecum*.



931 Similarly, flowering time and MAT (F) is shown, with examples of G) experiment 271A,  
932 (Larsen, 1947), *Schizachyrium scoparium*, and H) experiment 245A, (Ward, 1969), *Deschampsia*  
933 *caespitosa*. Full results for each trait/environment relationship are shown as additional results in  
934 Supporting Information Appendix S3.  
935  
936

937 Figure 1.

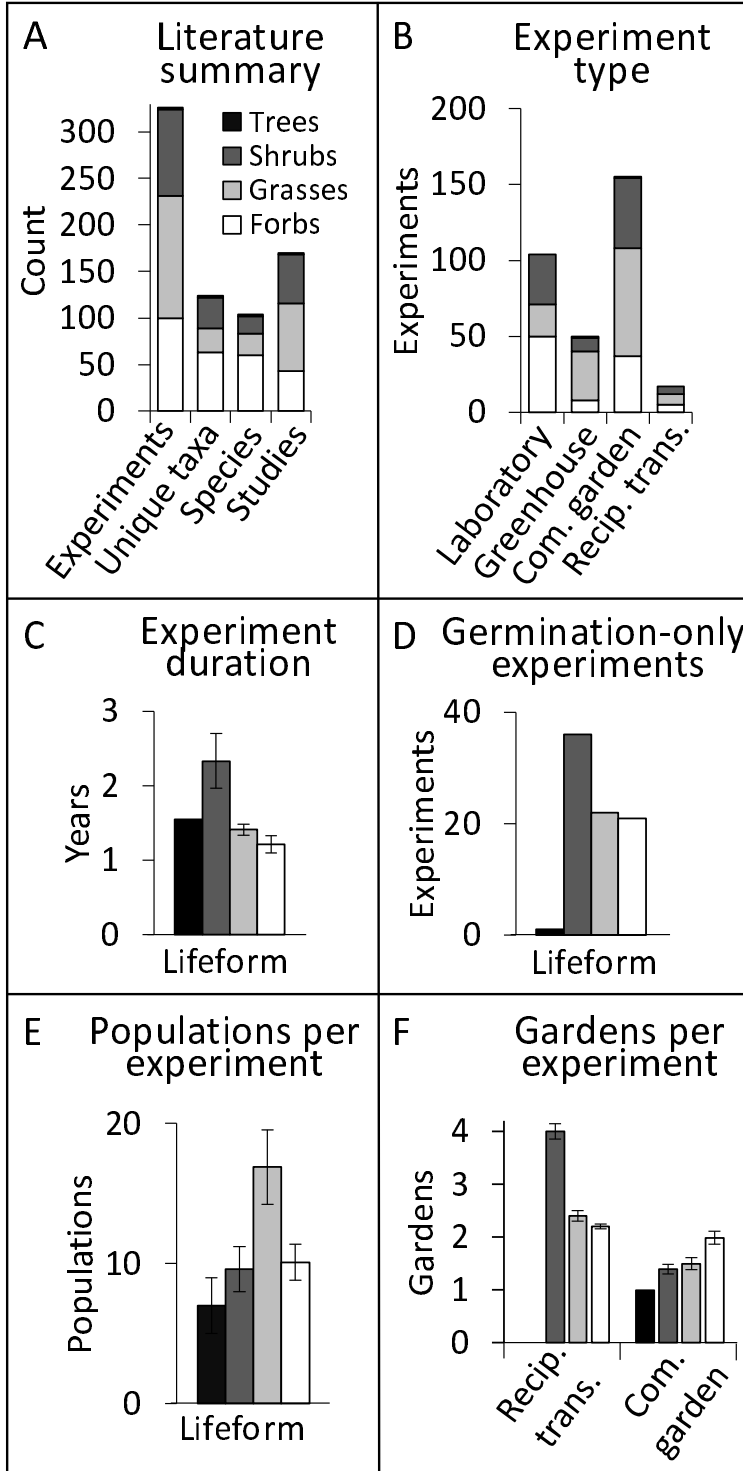

938

939

940

941 Figure 2.

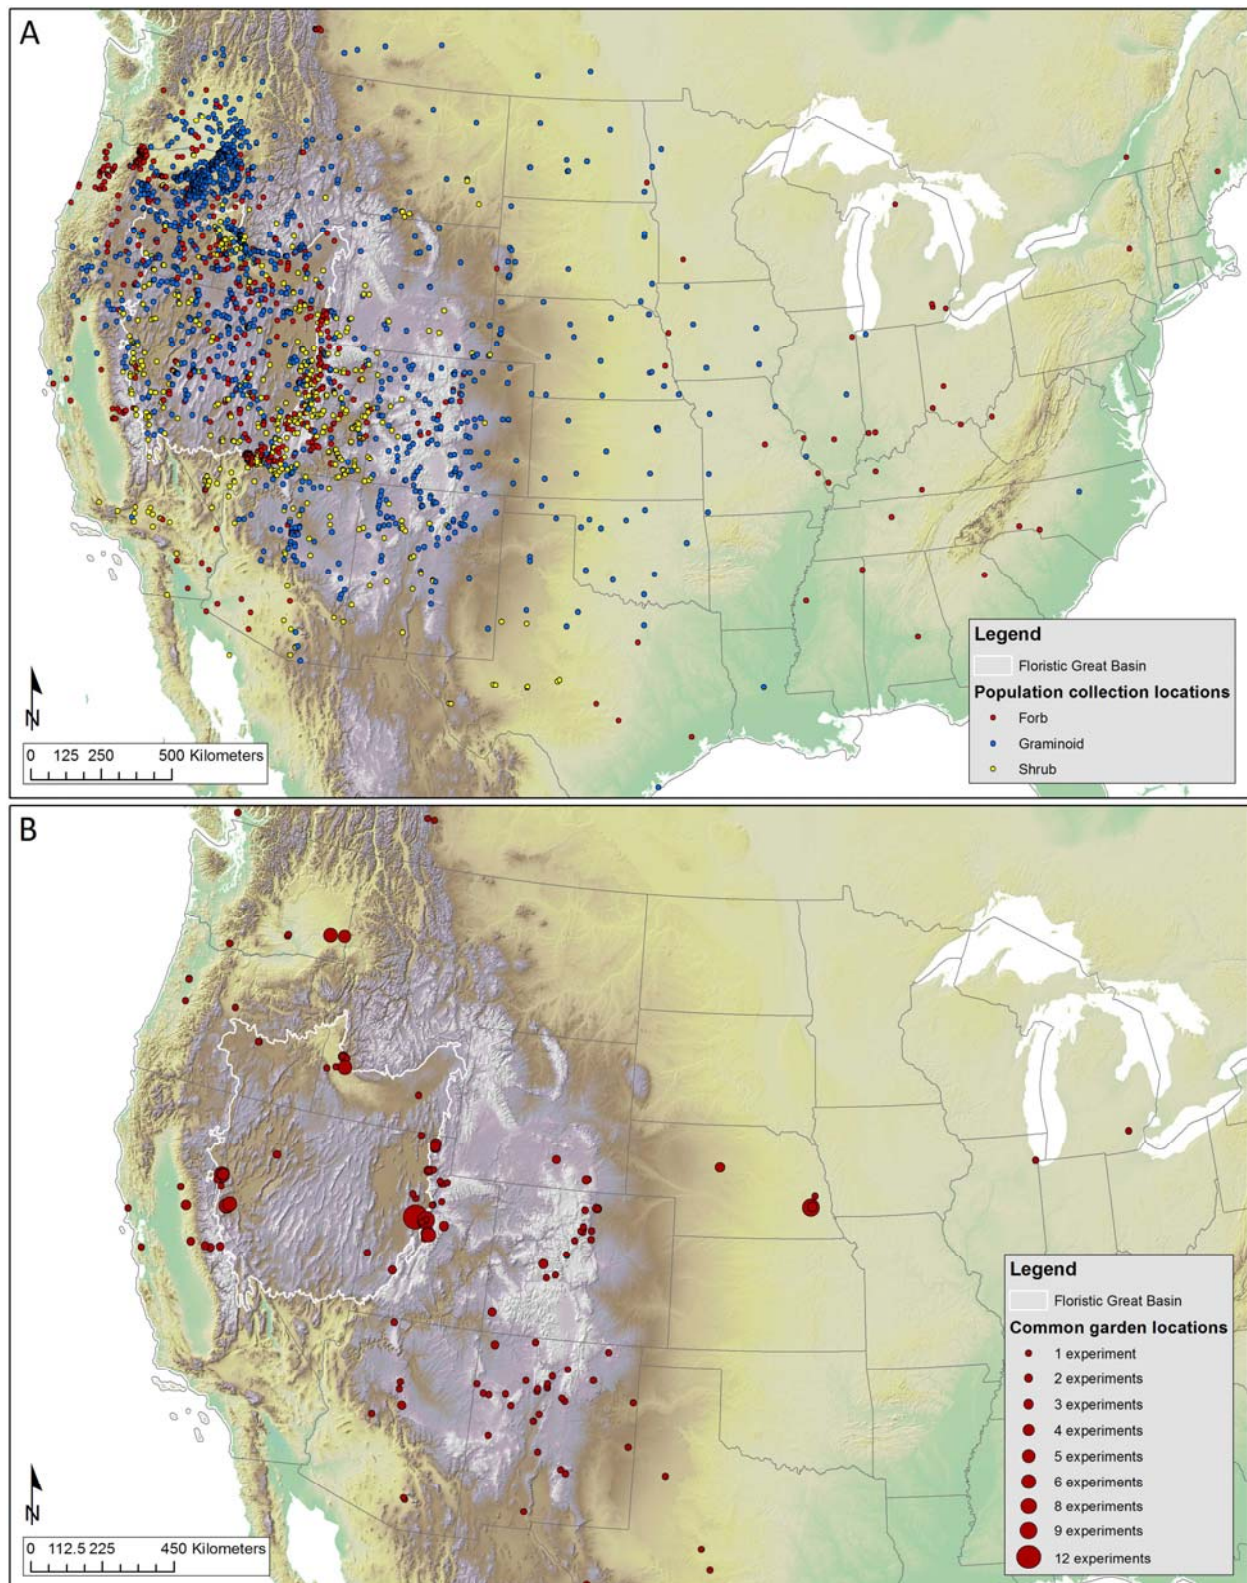

942

943

944 Figure 3.

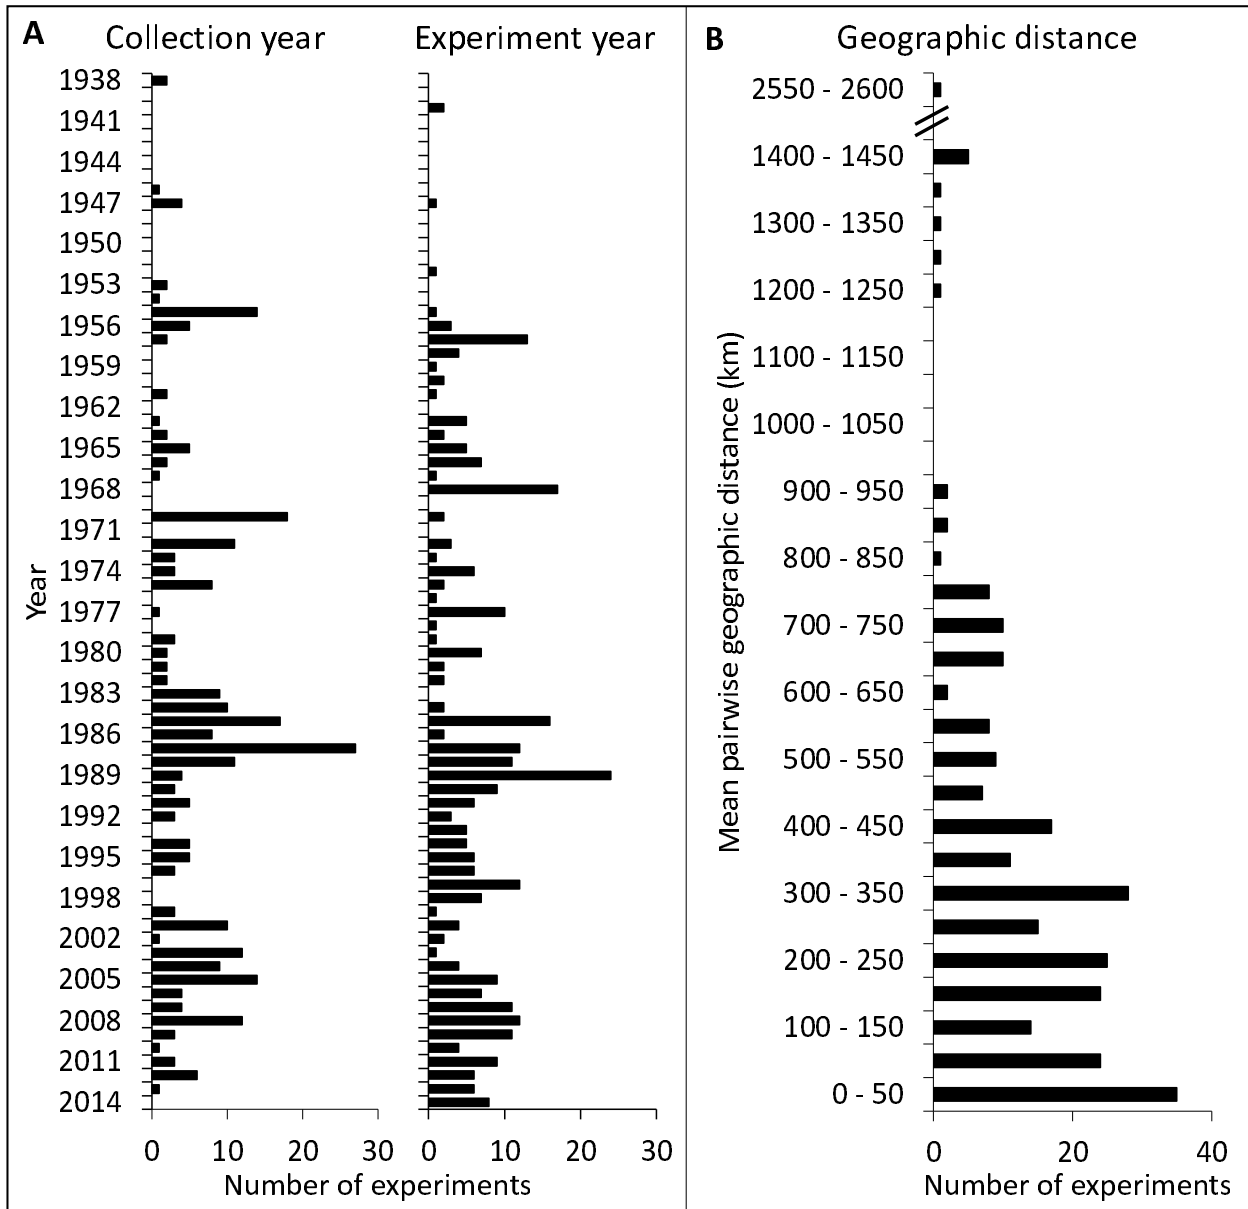

945

946

947 Figure 4.

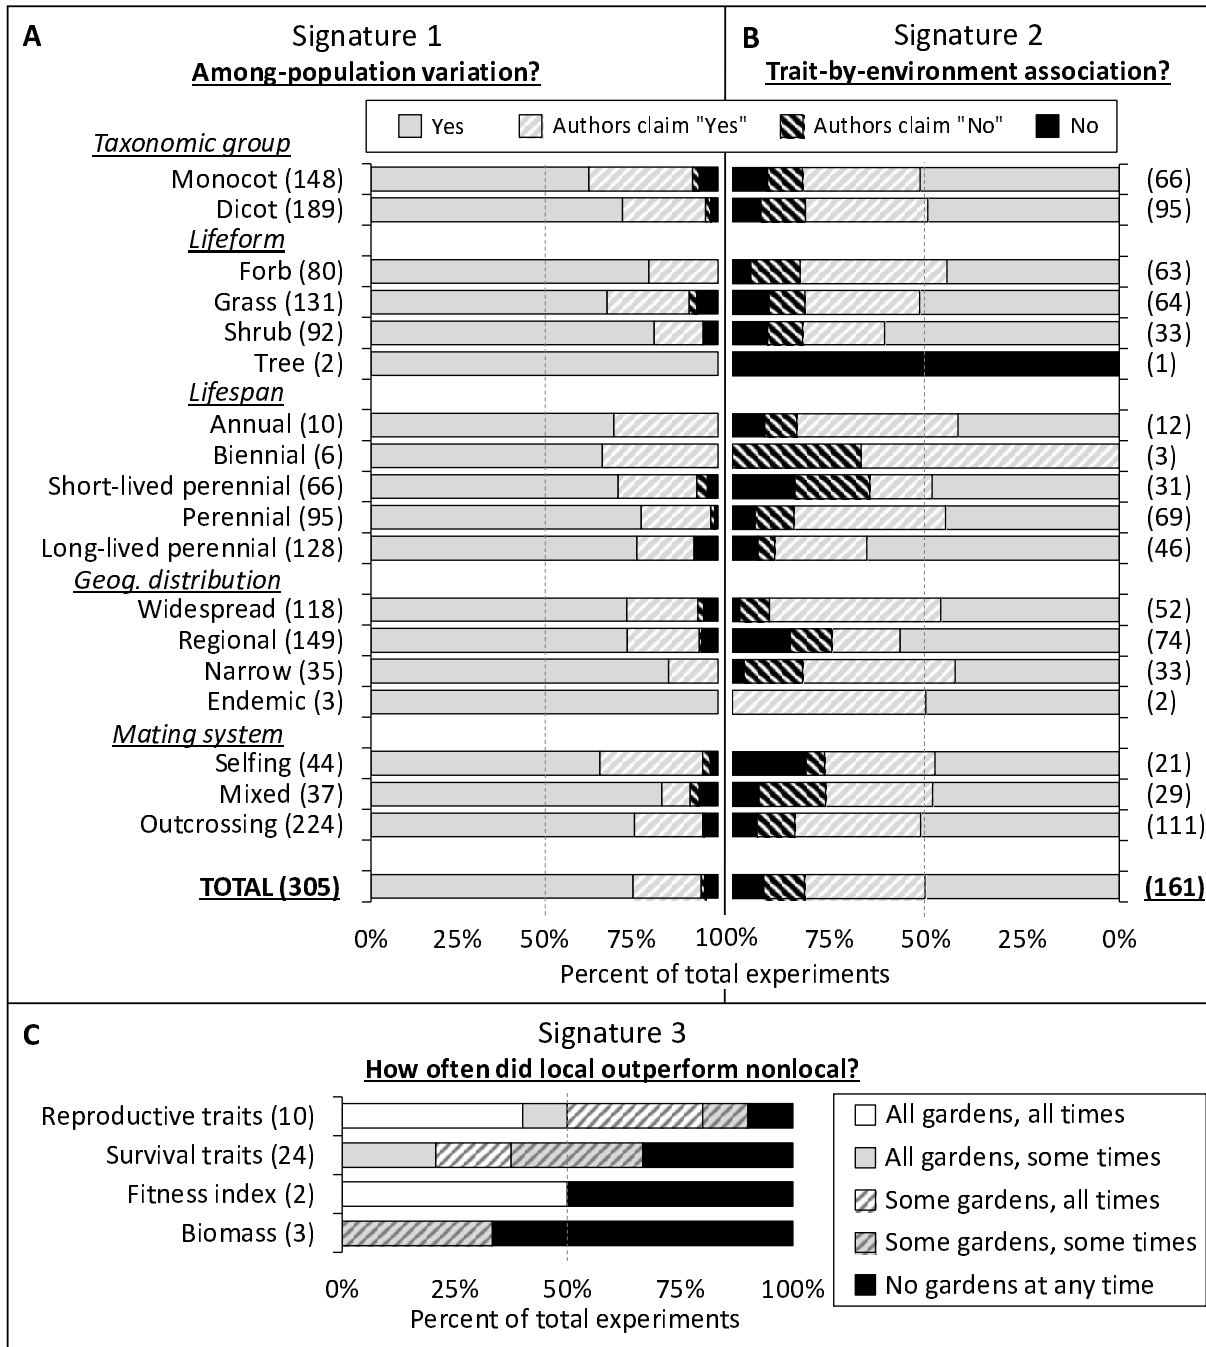

948

949

950

951 Figure 5.

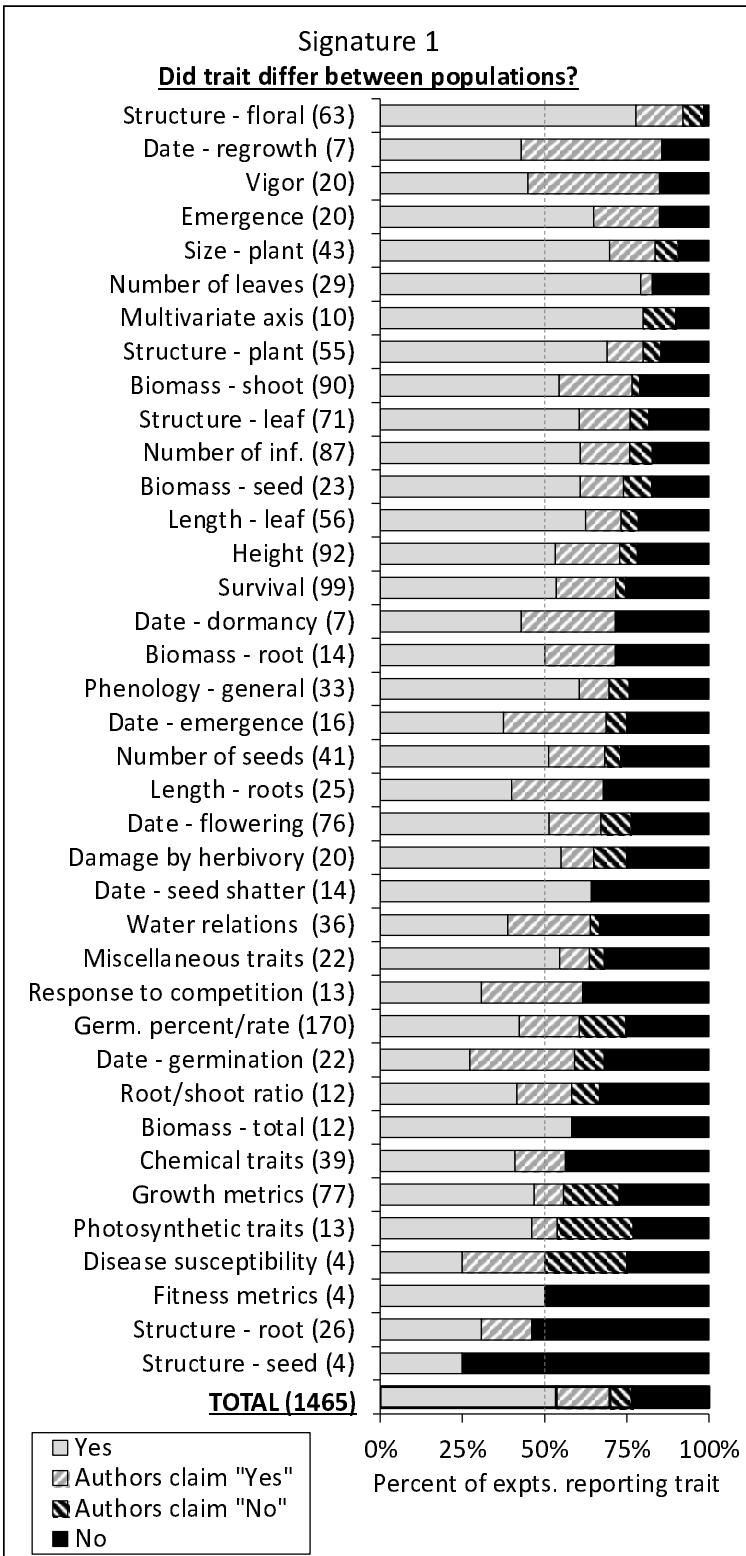

952

953 Figure 6.

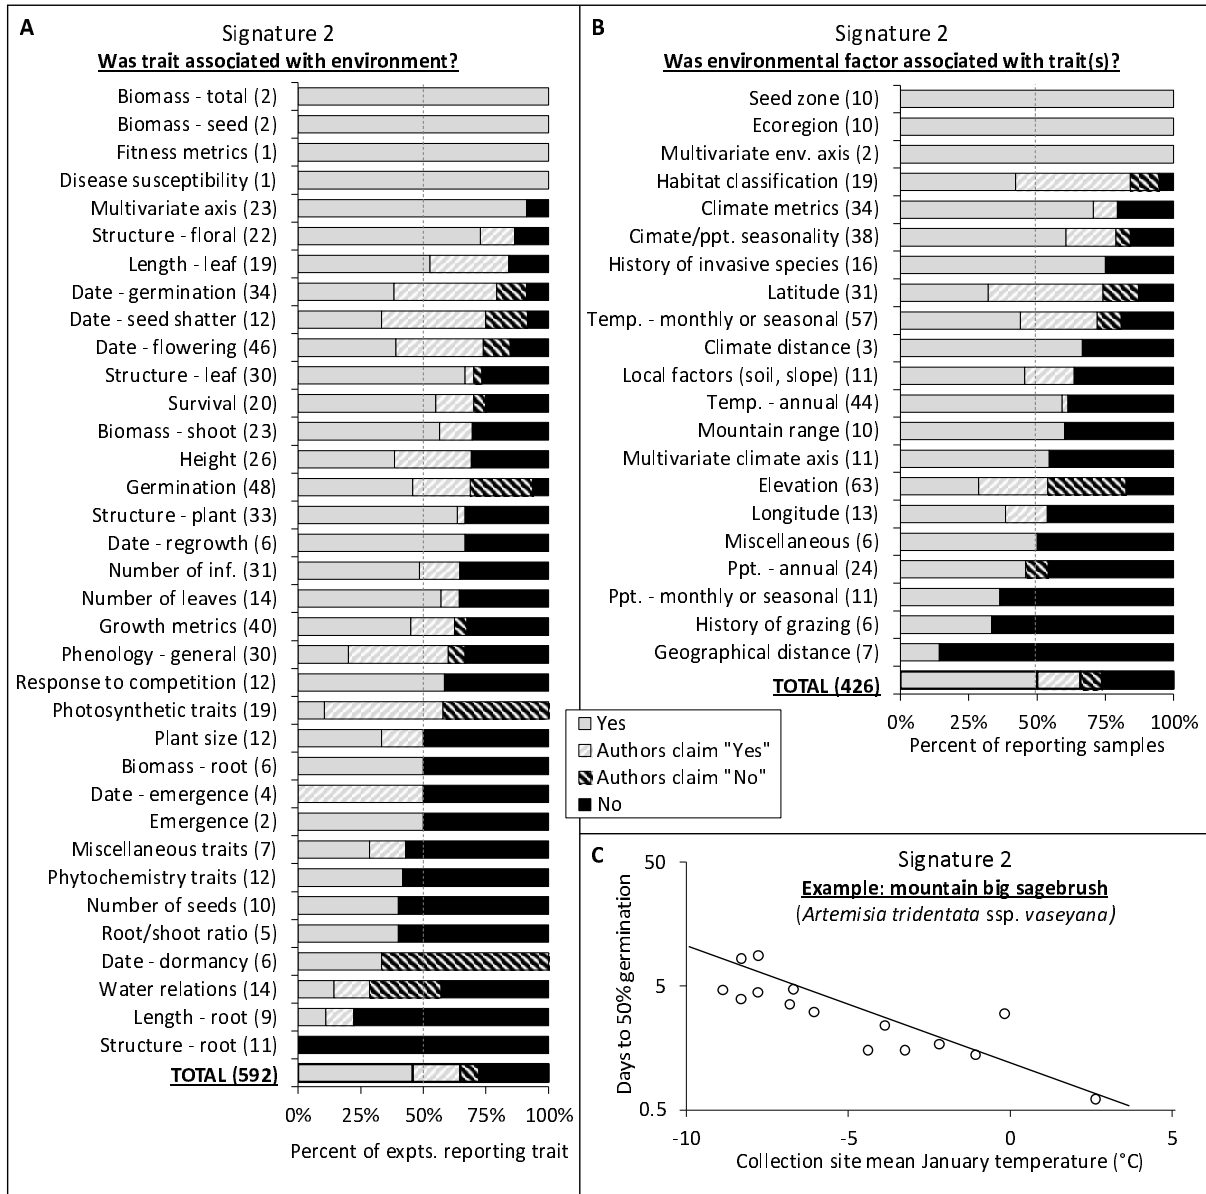

954

955

956

957

958 Figure 7.

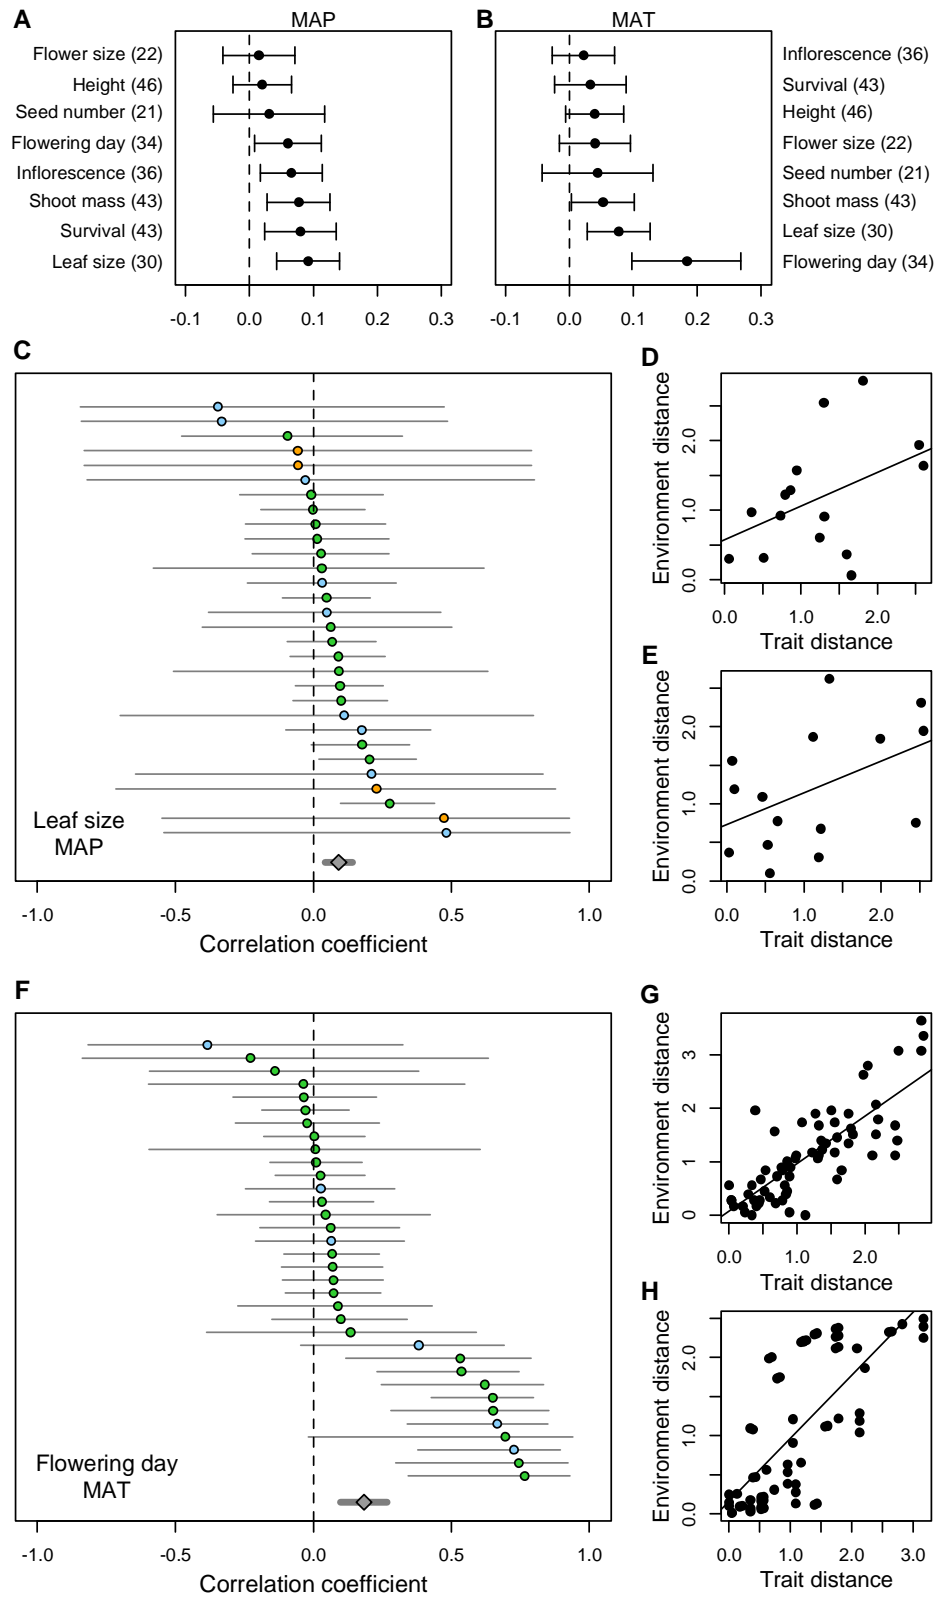

959
